## RESEARCH ARTICLE

# Tropomyosin 3.5 protects the F-actin networks required for tissue biomechanical properties

Catherine Cheng<sup>1,\*</sup>, Roberta B. Nowak<sup>1</sup>, Michael B. Amadeo<sup>1</sup>, Sondip K. Biswas<sup>2</sup>, Woo-Kuen Lo<sup>2</sup> and Velia M. Fowler<sup>1,‡</sup>

## ABSTRACT

Tropomyosins (Tpms) stabilize F-actin and regulate interactions with other actin-binding proteins. The eye lens changes shape in order to focus light to transmit a clear image, and thus lens organ function is tied to its biomechanical properties, presenting an opportunity to study Tpm functions in tissue mechanics. Mouse lenses contain Tpm3.5 (also known as TM5NM5), a previously unstudied isoform encoded by *Tpm3*, which is associated with F-actin on lens fiber cell membranes. Decreased levels of Tpm3.5 lead to softer and less mechanically resilient lenses that are unable to resume their original shape after compression. While cell organization and morphology appear unaffected, Tmod1 dissociates from the membrane in Tpm3.5-deficient lens fiber cells resulting in reorganization of the spectrin–F-actin and  $\alpha$ -actinin–F-actin networks at the membrane. These rearranged F-actin networks appear to be less able to support mechanical load and resilience, leading to an overall change in tissue mechanical properties. This is the first *in vivo* evidence that a Tpm protein is essential for cell biomechanical stability in a load-bearing non-muscle tissue, and indicates that Tpm3.5 protects mechanically stable, load-bearing F-actin *in vivo*.

This article has an associated First Person interview with the first author of the paper.

**KEY WORDS:** Eye, Lens fiber, Tropomodulin, Spectrin, Actinin, Fimbrin

## INTRODUCTION

Tropomyosins (Tpms) are conserved F-actin-binding proteins that stabilize filaments and regulate their interactions with a variety of actin-binding proteins, including cofilin/ADF filament-severing proteins,  $\alpha$ -actinin and fimbrin (plastin) filament-crosslinking proteins, tropomodulin (Tmod) filament minus ('pointed')-end-capping proteins and force-producing myosin motors (Christensen et al., 2017; Gunning et al., 2015; Hitchcock-DeGregori and Barua, 2017; Kostyukova, 2008; Nakano and Mabuchi, 2006; Ono and Ono, 2002; Winkelman et al., 2016; Yamashiro et al., 2012). Tpms are expressed in all animals and fungi (Barua et al., 2011; Cranz-Mileva et al., 2013), and in mammals, Tpms are expressed from four genes with alternative splicing that produces more than 40 variants in

different tissues (Geeves et al., 2015; Pittenger et al., 1994; Vindin and Gunning, 2013). *In vitro* studies demonstrate that F-actin assembly, elongation and disassembly rates depend on Tpm (Gunning et al., 2015; Hitchcock-DeGregori and Barua, 2017) and that Tpm isoforms direct assembly of different types of F-actin populations (Gateva et al., 2017; Janco et al., 2016). Tpm1.6 (also known as Tm2) and Tpm1.7 (also known as Tm3) protect F-actin from ADF/cofilin-mediated disassembly, while Tpm3.1 (also known as TM5NM1), Tpm3.2 (also known as TM5NM2) and Tpm4.2 (also known as Tm4) stimulate myosin IIA binding to F-actin but do not protect filaments from disassembly (Gateva et al., 2017).

Tpms function in various F-actin networks that play important roles in cell mechanics, including stress fibers in mammalian cells (Bryce et al., 2003; Percival et al., 2000; Schevzov et al., 2005b; Schevzov et al., 2011; Temm-Grove et al., 1998; Tojkander et al., 2011), F-actin cables in budding and fission yeast (Alioto et al., 2016; Clayton et al., 2014; Liu and Bretscher, 1989), and the contractile ring during cell division in yeast and metazoan cells (Balasubramanian et al., 1992; Eppinga et al., 2006; Hughes et al., 2003; Skau et al., 2009; Stark et al., 2010). To assemble distinct F-actin networks, cells express a complement of Tpm isoforms that can recruit different actin-binding proteins to growing filaments to create specialized networks. In cultured B35 rat neuronal cells, Tpm3.1 recruits myosin II to stress fibers leading to decreased lamellipodia formation and cell migration (Bryce et al., 2003; Schevzov et al., 2005a), while Tpm1.12 (also known as TmBr3) increases lamellipodia and cell migration with a reduction in stress fibers (Bryce et al., 2003). In U2OS cells, Tpm2.1 (also known as Tm1), Tpm3.1 and Tpm3.2 stabilize F-actin in focal adhesions while Tpm1.6 and/or Tpm1.7 are needed for dorsal stress fibers (Tojkander et al., 2011). Tpm4.2 recruits myosin II to stress fibers and creates contractile actomyosin bundles by assembling Tpm- and myosin II-coated F-actin from branched Arp2/3-nucleated and  $\alpha$ -actinin-crosslinked filaments (Tojkander et al., 2011).

While *in vitro* biochemistry and cellular studies suggest the importance of specific Tpm isoforms, little is known about which Tpms are needed for assembly and functions of specialized F-actin-networks *in vivo* in non-muscle cells or tissues. Studies of striated muscle have demonstrated the crucial roles Tpms play in F-actin stabilization in thin filaments, mediating  $Ca^{2+}$ -regulated muscle contraction and myosin cross-bridge cycling (Michele et al., 1999; Ottenheijm et al., 2011). Mutations in Tpms cause human myopathies leading to progressive muscle weakness or hypercontractile muscles (Clarke et al., 2008; Kee and Hardeman, 2008; Marttila et al., 2014; Ochala, 2008; Tajsharghi et al., 2012; Wattanasirichaigoon et al., 2002), indicating that muscle-specific Tpms are critical for force generation and muscle mechanical function. Considerably less is known about the roles of non-muscle Tpms in F-actin networks that contribute to *in vivo* mechanical stability of non-muscle cells or bulk tissue mechanics.

<sup>1</sup>Department of Molecular Medicine, The Scripps Research Institute, La Jolla, CA 92037, USA. <sup>2</sup>Department of Neurobiology, Morehouse School of Medicine, Atlanta, GA 30314, USA.

<sup>\*</sup>Present address: School of Optometry, Indiana University, Bloomington, IN 47405, USA.

<sup>‡</sup>Author for correspondence (velia@scripps.edu)

 V. M.F., 0000-0002-3161-8802

The eye lens is a unique non-connective tissue where organ function (fine focusing of light entering the eye) requires specific biomechanical properties, presenting an opportunity to study the role of non-muscle Tpm3s in tissue mechanical functions. The lens is a highly organized, transparent and ellipsoid-shaped organ in the anterior chamber of the eye that focuses light onto the retina to transmit a clear image. Bulk lens shape change through tension from ciliary muscles and zonular fibers allows for focusing of near and far objects in a process known as accommodation (Glasser, 2008; Keeney et al., 1995; Millodot, 2009). Age-related lens stiffening causes presbyopia, an inability of the lens to change shape to focus on near objects, and the subsequent need for reading glasses. Many studies have documented increases in mouse and human lens stiffness with age (Baradia et al., 2010; Cheng et al., 2016a; Glasser and Campbell, 1998; Glasser and Campbell, 1999; Scarcelli et al., 2011), but the molecular and cellular mechanisms that influence lens biomechanical properties remain unclear.

While our previous work shows that the actin cytoskeleton contributes to lens stiffness (Cheng et al., 2016b; Gokhin et al., 2012), the Tpm isoform composition of the lens is unknown and a role for Tpm3s in the biomechanical properties of the lens has not been studied. In this study, we perform a comprehensive analysis of all Tpm3s expressed in mouse lenses and reveal that one of the major Tpm3s expressed in fiber cells is Tpm3.5 (also known as TM5NM5), encoded by *Tpm3* (Geeves et al., 2015), is required for normal lens stiffness and resilience. Tpm3.5 is associated with F-actin-rich fiber cell membranes in distinct small puncta that are colocalized with Tmod1. Decreased levels of Tpm3.5 result in dissociation of Tmod1 from fiber cell membranes and a reorganization of the spectrin–F-actin and of  $\alpha$ -actinin–F-actin networks. We conclude that Tpm3.5 promotes Tmod1 association with the spectrin–F-actin network as well as with  $\alpha$ -actinin–F-actin networks at fiber cell membranes, and that decreased Tpm3.5 levels and the accompanying dissociation of Tmod1 leads to a rearrangement of F-actin networks that are then unable to support mechanical load and resilience in lens fiber cells. These data provide the first evidence that a

Tpm protein is required for biomechanical properties in a load-bearing non-muscle tissue and suggests that Tpm3.5 functions to stabilize mechanical-load-bearing F-actin in non-muscle tissues.

## RESULTS

### Tpm3.5 mRNA and protein are reduced in lenses from *Tpm3* $\Delta$ exon9d<sup>-/-</sup> mice

To study Tpm function in the lens, we examined *Tpm3* $\Delta$ exon9d<sup>-/-</sup> mice, an isoform-specific knockout of exon 9d in *Tpm3* (Fath et al., 2010; Hook et al., 2011; Lees et al., 2013). We first performed RT-PCR and sequencing for the Tpm3-encoded isoforms Tpm3.1 and Tpm3.2, which both contain exon 9d (see Fig. 1A for a diagram for the *Tpm3* exon structure), in the lens. Unexpectedly, we did not detect either Tpm3.1 or Tpm3.2 in the lens (Fig. 1B). Brain RNA from *Tpm3* $\Delta$ exon9d<sup>+/+</sup> and *Tpm3* $\Delta$ exon9d<sup>-/-</sup> mice was used as a control to ensure that the PCR protocol worked and to verify that exon 9d was not expressed in *Tpm3* $\Delta$ exon9d<sup>-/-</sup> mice, as expected (Fig. 1B). Our previous work had identified a short exon 9a-containing Tpm3 (also known as  $\gamma$ TM) associated with F-actin on mouse lens fiber cell membranes (Nowak et al., 2009). Based on this information, we designed primers to look for transcripts of *Tpm3* containing exon 9a. This analysis revealed that adult mouse lenses express Tpm3.5, a *Tpm3*-encoded isoform that includes exon 9a, and that there appeared to be a slight decrease in Tpm3.5 transcript levels in the lens RNA sample from the *Tpm3* $\Delta$ exon9d<sup>-/-</sup> versus *Tpm3* $\Delta$ exon9d<sup>+/+</sup> mice (Fig. 1B). Owing to high sequence similarity between various Tpm isoforms and the large number of splicing variants for each gene, it is difficult to design specific primers for real-time PCR. Thus, to verify and quantify the change in transcript level, we performed semi-quantitative PCR for Tpm3.5 and G3DPH (also known as GAPDH, a housekeeping gene) with RNA isolated from three pairs of *Tpm3* $\Delta$ exon9d<sup>+/+</sup> and three pairs of *Tpm3* $\Delta$ exon9d<sup>-/-</sup> lenses. This demonstrated that there was a statically significant decrease in Tpm3.5 transcripts in *Tpm3* $\Delta$ exon9d<sup>-/-</sup> lenses (Fig. 1C). Previous work showed exon 9a of the

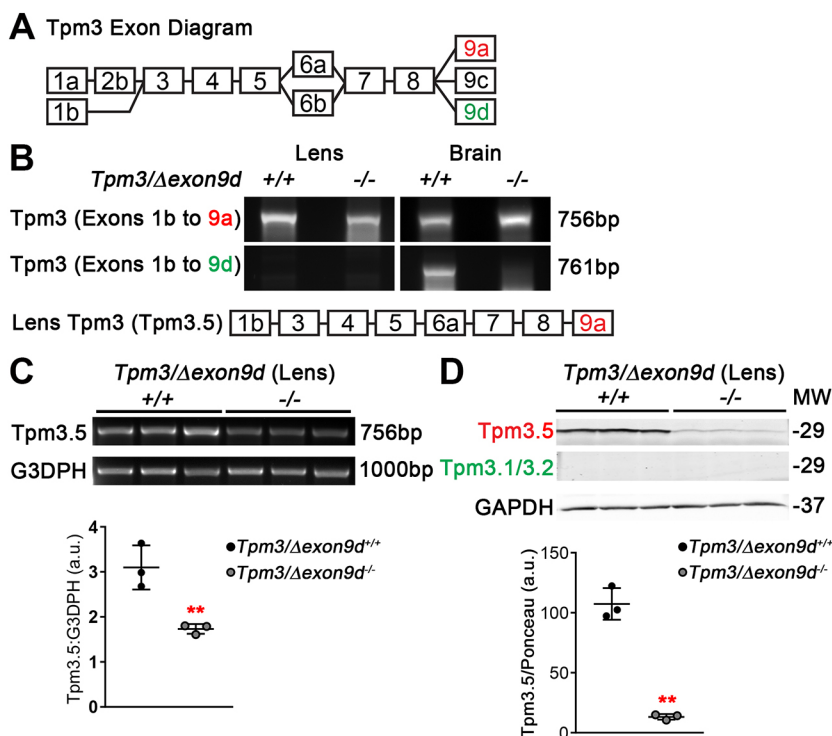

**Fig. 1. Tpm3.5 mRNA and protein are reduced in *Tpm3* $\Delta$ exon9d<sup>-/-</sup> mouse lenses.** (A) Diagram of *Tpm3* exons. Alternative splicing produces six known Tpm3 isoforms in mice. Not drawn to scale. (B) RT-PCR for Tpm3 isoforms in cDNA from *Tpm3* $\Delta$ exon9d<sup>+/+</sup> and *Tpm3* $\Delta$ exon9d<sup>-/-</sup> lenses and brain reveal that Tpm3 exon 9d is not detected in the lens, and instead contain Tpm3 exon 9a whose levels are unexpectedly reduced in the 9d-knockout (*Tpm3* $\Delta$ exon9d<sup>-/-</sup>) lens. Brain samples confirm that exon 9d is deleted. A diagram of the exons in Tpm3.5 is shown underneath. (C) Semiquantitative RT-PCR from three separate lens *Tpm3* $\Delta$ exon9d<sup>+/+</sup> and *Tpm3* $\Delta$ exon9d<sup>-/-</sup> cDNA samples reveals decreased *Tpm3.5* transcript levels. G3DPH was used as a housekeeping gene and loading control. (D) Western blots of *Tpm3* $\Delta$ exon9d<sup>+/+</sup> and *Tpm3* $\Delta$ exon9d<sup>-/-</sup> lenses reveal significantly decreased levels of Tpm3.5. Tpm3.1 and Tpm3.2, containing exon 9d, is not detected in lens samples. GAPDH is shown here to demonstrate equal loading of the samples. Ponceau S staining of total proteins on blots was used as a loading control. Plots reflect mean $\pm$ s.d. of  $n=3$  independent samples per genotype. \*\* $P<0.01$ .

*Tpm3* gene requires splicing to an additional exon 9 (b, c or d) in the 3' untranslated region (UTR) to generate a termination codon (Dufour et al., 1998). Our data indicates that *Tpm3.5* requires exon 9d in the 3'UTR to generate a stop codon in the mouse lens (Fig. S1A), suggesting a possible reason for the decrease in *Tpm3.5* transcripts in *Tpm3/Δexon9d<sup>-/-</sup>* lenses. We next examined *Tpm3.5* protein levels in control and mutant lenses by western blotting using an exon 9a-specific antibody, and observed a dramatic decrease in *Tpm3.5* protein levels in *Tpm3/Δexon9d<sup>-/-</sup>* lenses (Fig. 1D). Thus, we conclude that, in adult mouse lenses, deletion of exon 9d from the *Tpm3* gene results in an unexpected knockdown of the exon 9a-containing *Tpm3.5* transcript and protein levels.

Based on known isoforms of mouse *Tpms* (Geeves et al., 2015), we also designed specific primer sets to determine whether other *Tpms* are expressed in adult mouse lenses, and whether expression of any of these *Tpms* might be altered in the *Tpm3/Δexon9d<sup>-/-</sup>* mouse lens (Fig. S1B). Our RT-PCR and sequencing experiments detected five other *Tpm* transcripts, *Tpms* 1.7 (also known as *Tm3*), 1.8 (also known as *Tm5a*), 1.9, 1.13 and 4.2 (Table S1; Fig. S1C). These transcripts were present at lower levels than *Tpm3.5*, and there did not appear to be obvious compensation revealed by increased expression of any of these other *Tpm* isoforms in *Tpm3/Δexon9d<sup>-/-</sup>* lenses (Fig. S1B). We did not detect other *Tpm3* isoforms in the lens (Fig. S1D). From sequencing results, we determined that the lens does not express *Tpm3.3*, which differs from *Tpm3.5* only at exon 6 (data not shown). We also did not detect any *Tpms* that are only expressed in *Tpm3/Δexon9d<sup>-/-</sup>* lenses nor any alternative splice isoforms of *Tpm3.5* in control or mutant lenses (data not shown). Thus, the *Tpm3/Δexon9d<sup>-/-</sup>* mouse lens provides a tool to understand the function of *Tpm3.5*.

### Decreased levels of *Tpm3.5* lead to mild anterior cataracts, subtle changes in lens shape and a marked enlargement of the lens nucleus

To evaluate whether reduced levels of *Tpm3.5* leads to alterations in whole-lens properties, we first examined lenses from 6-week-old *Tpm3/Δexon9d<sup>+/+</sup>* and *Tpm3/Δexon9d<sup>-/-</sup>* mice (hereafter 6-week-old lenses) and found no obvious cataracts in *Tpm3/Δexon9d<sup>-/-</sup>* lenses (Fig. 2A). Although we observed sporadic, very small punctate opacities near the anterior pole of *Tpm3/Δexon9d<sup>-/-</sup>* lenses (data not shown), these minor defects occurred at very low frequency and were not further investigated. We also found that although the overall lens volume was unchanged in 8-week-old *Tpm3/Δexon9d<sup>-/-</sup>* lenses, *Tpm3/Δexon9d<sup>-/-</sup>* lenses had a slightly more spherical shape due to decreased equatorial diameter and increased axial diameter (i.e. decreased aspect ratio) (Fig. 2B). We also measured the wet lens weight for 6-week-old control and mutant lenses and found no significant difference [*Tpm3/Δexon9d<sup>+/+</sup>* wet lens weight, 4.94±0.33 mg (*n*=32) and *Tpm3/Δexon9d<sup>-/-</sup>* wet lens weight, 4.88±0.22 mg (*n*=32); mean±s.d.]. Subtle anterior opacities and altered lens shape may be due to abnormalities in lens epithelial cell homeostasis or differentiation to fiber cells at the equator, which we have not studied further. Mouse lenses have a very hard central portion where the oldest fiber cells are located, termed the nucleus, that can be mechanically separated from softer cortical fiber cells (Cheng et al., 2016a; Gokhin et al., 2012). Compared to littermate controls, *Tpm3/Δexon9d<sup>-/-</sup>* lenses had increased nuclear volume that occupied a higher fraction of the lens (Fig. 2A,B). These results suggest that *Tpm3.5* is important for lens shape and fiber cell maturation.

### *Tpm3.5* is required for lens stiffness and resilience

To determine whether decreased *Tpm3.5* leads to altered lens biomechanical properties, we measured the stiffness of 8-week-old

*Tpm3/Δexon9d<sup>+/+</sup>* and *Tpm3/Δexon9d<sup>-/-</sup>* lenses using a simple coverslip compression method (Cheng et al., 2016a; Gokhin et al., 2012). In this method, the lens is viewed through a dissection microscope and coverslips are sequentially loaded onto the tissue resulting in axial compression and equatorial expansion of the lens. Images taken of the lens under load were then used to calculate the percentage change in axial and equatorial dimensions (strain) and recovery after removal of load (resilience). In *Tpm3/Δexon9d<sup>-/-</sup>* lenses, there was an increase in axial compressive strain at high loads (7–10 coverslips) as well as in equatorial strain at high loads (9–10 coverslips) (Fig. 2C,D), indicating that mutant lenses are softer than control lenses at high mechanical loads. Dot plots of axial and equatorial strains show no detectable difference in the stiffness of mutant lenses at low load (1 coverslip) while there was a significant increase in strain at the maximum load (10 coverslips), indicative of softer lenses (Fig. 2E,F). We also examined recovery of lens shape after removal of load by calculating the ratio between the pre-loading and post-loading axial diameter (resilience). Our data revealed that *Tpm3/Δexon9d<sup>-/-</sup>* lenses had dramatically decreased resilience and only recovered to 88.86±2.03% (mean±s.d.) of the pre-loading axial diameter (Fig. 2G,H). These data indicate that *Tpm3.5* is needed for normal lens stiffness and resilience. We also conclude that the hard lens nucleus does not appear to affect bulk lens stiffness in an axial compression assay, since decreased *Tpm3.5* leads to a softer lens despite the larger size of the hard central lens nucleus.

### *Tpm3.5* is associated with F-actin-rich fiber cell membranes, but decreased levels of *Tpm3.5* do not affect fiber cell hexagonal packing nor intercellular interdigitations

A monolayer of epithelial cells covers the anterior hemisphere of the lens, while the bulk of the lens is composed of elongated fiber cells (Fig. S2A). Fibers are long and thin cells that stretch from the anterior to posterior poles. Fiber cells are hexagonal in cross section to effectively pack cells and minimize light scattering intercellular spaces (Kuszak et al., 2006; Kuszak et al., 2004). We examined the packing of hexagonal fiber cells in *Tpm3/Δexon9d<sup>+/+</sup>* and *Tpm3/Δexon9d<sup>-/-</sup>* lenses by immunostaining frozen lens sections in the equatorial cross orientation. Staining for *Tpm3.5* and F-actin reveals organized cortical fiber cells packed into neat rows of hexagonal cells in both *Tpm3/Δexon9d<sup>+/+</sup>* and *Tpm3/Δexon9d<sup>-/-</sup>* lenses, indicating that decreased *Tpm3.5* does not affect overall fiber cell shape and hexagonal packing organization (Fig. S3A). *Tpm3.5* colocalizes with F-actin along the fiber cell membranes of *Tpm3/Δexon9d<sup>+/+</sup>* lenses, in agreement with previous work (Nowak et al., 2009), and is also present in the lens epithelium. A lower *Tpm3.5* staining signal is observed in mutant lens sections, as expected from biochemistry data (Fig. 1D). Furthermore, while F-actin staining appears to be crisply delineated at the mutant lens fiber cell membrane, *Tpm3.5* staining appears to be more cytoplasmic (Fig. S3A, asterisks).

During cell maturation, lens fibers develop specialized F-actin-rich interlocking membrane interdigitations. Peripheral cortical lens fiber cells are relatively straight with small F-actin rich protrusions (~1 μm long) along their lengths, while mature fibers have an undulating morphology with small F-actin-rich protrusions projecting from large F-actin-containing paddle domains (~5–10 μm) (Fig. S2B) (Blankenship et al., 2007; Cheng et al., 2016b; Kuwabara, 1975; Lo et al., 2014; Willekens and Vrensen, 1981; Willekens and Vrensen, 1982). It has long been hypothesized that these interlocking domains are required for mechanical integrity during lens shape change. Therefore, we examined *Tpm3.5* and F-actin subcellular localization with respect to fiber cell membrane morphologies in individual lens fiber cells from *Tpm3/Δexon9d<sup>+/+</sup>*



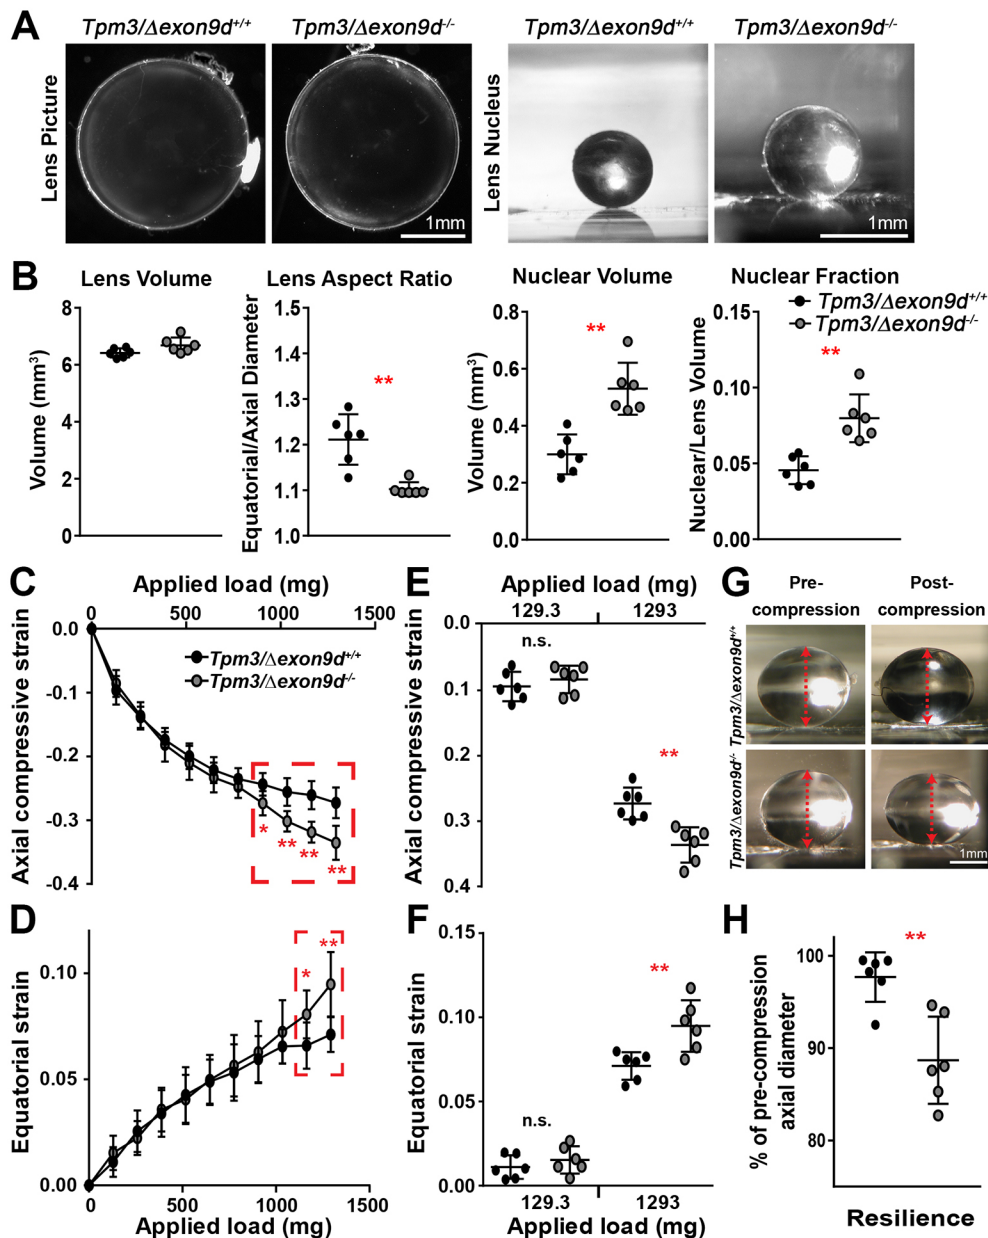

**Fig. 2.** *Tpm3/Dexon9d<sup>-/-</sup>* lenses have mildly altered morphometrics and are softer at high mechanical loads with decreased resilience after compression. (A) Pictures of freshly dissected 6-week-old *Tpm3/Dexon9d<sup>+/+</sup>* and *Tpm3/Dexon9d<sup>-/-</sup>* lenses (top view). *Tpm3/Dexon9d<sup>-/-</sup>* lenses do not have obvious cataracts. The rigid lens nucleus can be dissected away from the soft lens cortex. In the 8-week-old *Tpm3/Dexon9d<sup>-/-</sup>* lens, the nucleus is larger than that in the control lens. (B) Morphometric analysis of 8-week-old *Tpm3/Dexon9d<sup>+/+</sup>* and *Tpm3/Dexon9d<sup>-/-</sup>* lenses reveals no change in the lens volume, but *Tpm3/Dexon9d<sup>-/-</sup>* lenses are more spherical with a decreased lens aspect ratio. Mutant lenses also had an increased nuclear volume and nuclear fraction. (C,D) Compression testing of 8-week-old *Tpm3/Dexon9d<sup>+/+</sup>* and *Tpm3/Dexon9d<sup>-/-</sup>* lenses revealed increased axial and equatorial strain at high mechanical loads (1034.4–1293 mg, 8–10 coverslips). (E,F) Dot plots of axial and equatorial strain at the lowest load (129.3 mg, 1 coverslip) and the maximum load (1293 mg, 10 coverslips) showed increased strain in *Tpm3/Dexon9d<sup>-/-</sup>* lenses at the maximum load. (G) Side view pictures of *Tpm3/Dexon9d<sup>+/+</sup>* and *Tpm3/Dexon9d<sup>-/-</sup>* lenses pre-compression and post-compression. The red dashed lines indicate the axial diameter. (H) *Tpm3/Dexon9d<sup>-/-</sup>* lenses had decreased resilience, calculated as the ratio of the pre-compression over post-compression axial diameter. While control *Tpm3/Dexon9d<sup>+/+</sup>* lenses recovered to 97.24±0.83% of the pre-compression axial diameter, mutant *Tpm3/Dexon9d<sup>-/-</sup>* lenses only returned to 88.86±2.03% of the pre-loading axial diameter. This indicates that mutant lenses were unable to recover their normal shape after removal of mechanical load. Plots reflect mean±s.d. of *n*=6 lenses per genotype. \**P*<0.05; \*\**P*<0.01. Scale bars, 1 mm.

and *Tpm3/Dexon9d<sup>-/-</sup>* lenses, isolated as previously described (Cheng et al., 2016b). Owing to the small sizes of F-actin-rich membrane protrusions and the complex geometry of mature fiber cells, we performed super-resolution confocal microscopy using Airyscan, with a resolution of 140 nm laterally and 400 nm axially. Single optical sections through the center of the cell are presented in all individual fiber cell immunostaining images. Tpm3.5 is localized in small puncta in F-actin-rich regions along the

membrane of mature lens fiber cells (Fig. 3), and the Tpm3.5 staining signal is dramatically reduced in mutant lens fibers (Fig. 3), as expected from our earlier results (Fig. 1D; Fig. S3A). Enlargements of control *Tpm3/Dexon9d<sup>+/+</sup>* mature fiber cell images reveal that Tpm3.5 puncta are associated with F-actin in small protrusions and at their bases (Fig. 3B, arrows). In contrast, in the mutant *Tpm3/Dexon9d<sup>-/-</sup>* mature lens fiber, small Tpm3.5 puncta no longer appear in protrusions, and only a few residual

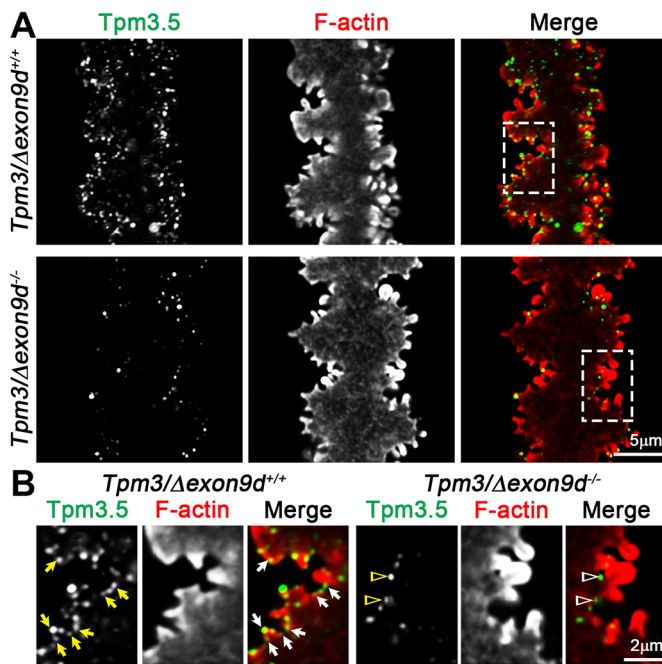

**Fig. 3. Tpm3.5 is localized in small puncta along the fiber cell membrane.** Immunostaining of single fiber cells from 6-week-old *Tpm3/Δexon9d<sup>+/+</sup>* and *Tpm3/Δexon9d<sup>-/-</sup>* lenses for Tpm3.5 (green) and F-actin (red). Images are single optical sections through the cell cytoplasm. (A) In the mature *Tpm3/Δexon9d<sup>+/+</sup>* fiber cell, Tpm3.5 is enriched in puncta along the cell membrane, colocalizing with F-actin. There is an obvious decrease in Tpm3.5 staining in the mature *Tpm3/Δexon9d<sup>-/-</sup>* lens fiber. The mutant mature fiber has large paddle domains decorated by small protrusions similar to those in the control lens fiber. (B) An enlargement of a paddle region from the control mature fiber reveals Tpm3.5 puncta along the cell membrane at the tips of and near the base of small protrusions (arrows). In the mutant lens fiber, Tpm3.5 staining is drastically reduced at the cell membrane and remaining small puncta containing Tpm3.5 are mostly at the base of small protrusions (open arrowheads). Scale bars: 5 μm (A); 2 μm (B).

Tpm3.5 puncta are observed near the base of small protrusions (Fig. 3B, open arrowheads). Despite reduced overall levels of Tpm3.5 and its selective absence from small protrusions, no obvious changes in F-actin distribution or intensity were apparent in mutant *Tpm3/Δexon9d<sup>-/-</sup>* lens fibers. Moreover, unlike the loss of large paddles seen in mature *Tmod1<sup>-/-</sup>* lens fibers (Cheng et al., 2016b), there were no detectable differences in the morphologies of large paddles or small protrusions in *Tpm3/Δexon9d<sup>-/-</sup>* lens fibers.

To verify that the complex interdigitations between mutant lens fibers are unchanged, we also performed scanning electron microscopy (SEM) of microdissected lens halves to visualize fiber cell profiles *in situ* in 2-month-old *Tpm3/Δexon9d<sup>+/+</sup>* and *Tpm3/Δexon9d<sup>-/-</sup>* lenses. Consistent with single-fiber cell immunostaining experiments, there were no obvious differences in small protrusions or large paddle domains between *Tpm3/Δexon9d<sup>+/+</sup>* and *Tpm3/Δexon9d<sup>-/-</sup>* mature lens fibers (Fig. S3B). We also compared inner fiber cells of the lens nucleus and did not see any obvious changes in those cells. Thus, reduced levels of Tpm 3.5 protein in *Tpm3/Δexon9d<sup>-/-</sup>* lenses do not appear to affect fiber cell morphology, including formation of interlocking interdigitations between lens fibers. Therefore, we conclude that the loss of stiffness at high mechanical load and loss of resilience in *Tpm3/Δexon9d<sup>-/-</sup>* lenses are not due to morphological alterations in interlocking interdigitations between fiber cells.

### Tpm3.5 stabilizes Tmod1 and the β2-spectrin-based membrane skeleton in lens fiber cells

Tpms enhance the capping affinity of Tmods for F-actin pointed ends, and together, Tpms and Tmods promote F-actin stability *in vitro* (Kostyukova, 2008; Lewis et al., 2014; Rao et al., 2014; Yamashiro et al., 2012; Yamashiro et al., 2014), in the spectrin–F-actin membrane skeleton of lens fiber cells (Cheng et al., 2016b; Gokhin et al., 2012) and polarized epithelial cells (Nowak et al., 2009; Weber et al., 2007), and in contractile myofibrils of cardiomyocytes (Mudry et al., 2003). Therefore, we hypothesized that decreased levels of Tpm3.5 in the lens might reduce the association of Tmod1 with F-actin, leading to F-actin and membrane skeleton instability and thereby compromising lens stiffness.

To test this idea, we first determined whether Tpm3.5 is colocalized with Tmod1 and F-actin at the membrane of lens fibers. Double immunolabeling revealed that Tpm3.5 and Tmod1 are often colocalized in small puncta along the membrane of the small F-actin rich protrusions in the control *Tpm3/Δexon9d<sup>+/+</sup>* mature lens fiber cell (Fig. 4, open arrowheads in B). We had not previously detected Tmod1 along the base of small protrusions (Cheng et al., 2016b), which has now been revealed by highly sensitive super-resolution Airyscan confocal microscopy. In control lens fiber cells, we observe that Tmod1 is enriched in valleys between large paddles (Fig. 4, arrows), consistent with our previous data (Cheng et al., 2016b), but while Tpm3.5 is present in the valleys between large paddles, the staining signal does not appear to be enriched in those areas. By contrast, in the Tpm3.5-deficient mutant lens fiber, Tmod1 now appears dispersed in many small puncta throughout the cytoplasm (Fig. 4A, asterisk, B, open arrows), while the residual Tpm3.5 staining is enriched and colocalized with the few remaining large Tmod1 puncta that persist in the valleys between large paddles in the *Tpm3/Δexon9d<sup>-/-</sup>* mature lens fibers (Fig. 4B, arrows). We assessed the colocalization between Tmod1 and Tpm3.5 by determining the Manders' coefficient, which measures the fraction of one protein that colocalizes with a second protein (Dunn et al., 2011; Manders et al., 1993). We found that the Manders' coefficient for Tmod1–Tpm3.5 is  $0.786 \pm 0.096$  in control cells and  $0.427 \pm 0.190$  in mutant cells (mean  $\pm$  s.d.;  $P=0.022$ ), in agreement with our visual observations. Immunostaining of lens cross sections also revealed dissociation of Tmod1 from mature fiber cell membranes in the *Tpm3/Δexon9d<sup>-/-</sup>* sample (Fig. S4A). We conclude that reduced levels of Tpm3.5 lead to dissociation of Tmod1 from F-actin at the fiber cell membrane. These cytoplasmic Tmod1 puncta may reflect abnormal Tmod1 capping of transcellular F-actin networks that are weakly stained in the fiber cell cytoplasm (Fig. 4A, asterisk), as immunostaining of cytosolic Tmod1 would be expected to be diffuse rather than punctate.

Next, to test the possibility that reduction of Tpm3.5 levels and dissociation of Tmod1 in the *Tpm3/Δexon9d<sup>-/-</sup>* lens might affect membrane skeleton organization, we examined the localization of the membrane skeleton component β2-spectrin in single lens fibers from *Tpm3/Δexon9d<sup>+/+</sup>* and *Tpm3/Δexon9d<sup>-/-</sup>* lenses. In the control lens fiber cell, β2-spectrin colocalizes with Tmod1 in puncta along F-actin-rich membranes, with especially large bright Tmod1 and β2-spectrin puncta located in the valleys between large paddles (Fig. 5, arrows), as previously shown (Cheng et al., 2016b), as well as in small puncta near the base of small protrusions (Fig. 5B, arrowheads). By contrast, in the *Tpm3/Δexon9d<sup>-/-</sup>* mature fiber, β2-spectrin staining appears increased and more-continuous along the membrane at the bases of small protrusions (Fig. 5, open arrowheads), unlike the discrete β2-spectrin puncta in the *Tpm3/*

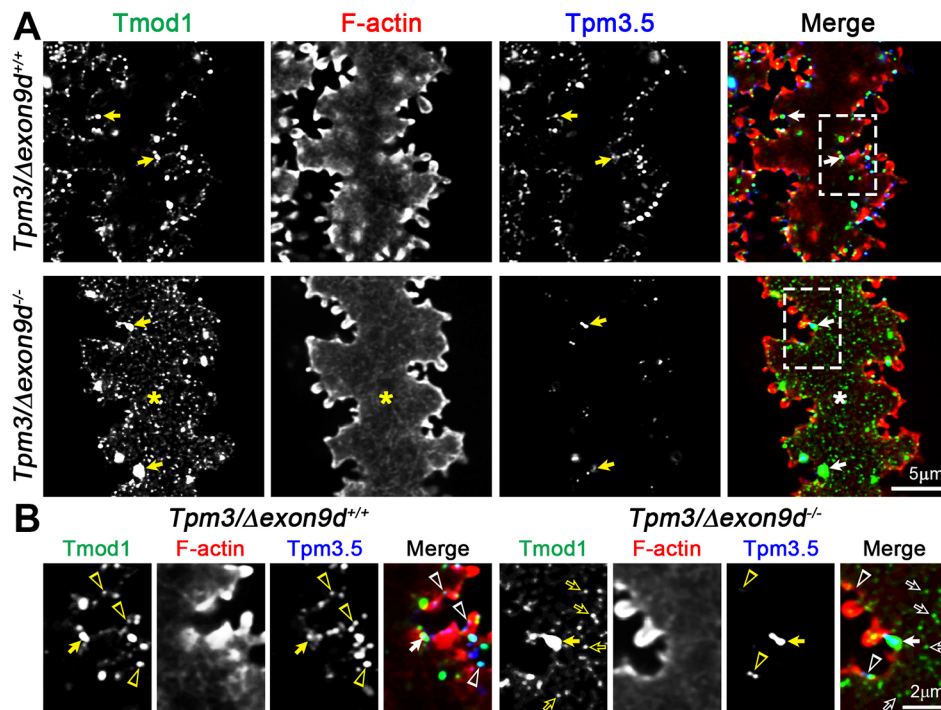

**Fig. 4. Tmod1 is colocalized with Tpm3.5 and F-actin at the membrane of lens fiber cells and dissociates from the membrane in *Tpm3/Δexon9d*<sup>-/-</sup> lenses.** Immunostaining of single mature fiber cells from 6-week-old *Tpm3/Δexon9d*<sup>+/+</sup> and *Tpm3/Δexon9d*<sup>-/-</sup> lenses for Tmod1 (green), F-actin (red) and Tpm3.5 (blue). Images are single optical sections through the cell cytoplasm. (A) In the *Tpm3/Δexon9d*<sup>+/+</sup> mature lens fiber, we observe bright Tmod1 puncta with Tpm3.5 in the valleys between large paddles (arrows) and dimmer Tmod1 puncta along with Tpm3.5 puncta along the cell membrane. The mutant mature fiber cell has decreased Tpm3.5 staining along with appearance of Tmod1 puncta in the cell cytoplasm (asterisk). Bright Tmod1 puncta remain at the membrane in the valleys between large paddles in the mutant fiber cell. In the cytoplasm of both control and mutant lens fibers, there is a weakly stained transcellular F-actin network. (B) An enlargement from the control lens fiber reveals that Tmod1 and Tpm3.5 puncta are often colocalized along the cell membrane (open arrowheads). Tmod1 is enriched in the valleys between large paddles along with less-intense Tpm3.5 staining in these areas (arrows). In the mutant lens fiber, most of the Tpm3.5 signal is absent from the cell membrane with only a few remaining puncta of staining (open arrowheads). Many Tmod1 puncta are now in the cytoplasm (open arrows), and the residual Tpm3.5 is enriched in the valleys between large paddles along with Tmod1 (arrow). Scale bars: 5 μm (A); 2 μm (B).

*Δexon9d*<sup>+/+</sup> lens fiber. Again, we observe that Tmod1 staining is present in the mutant cell cytoplasm (Fig. 5B, open arrows). Thus, decreased levels of Tpm3.5 led to the redistribution of β2-spectrin at the membrane to give a more-continuous pattern. Other work has shown that Tpm3s can inhibit the binding of spectrin to F-actin *in vitro* (Fowler and Bennett, 1984b). Thus, we hypothesize that β2-spectrin may now occupy regions of F-actin at the fiber cell membrane that would have been occupied by Tpm3.5, suggesting that there has been a change in the organization of the F-actin network.

#### Localization of α-actinin and fimbrin, but not Arp3 or N-cadherin, is altered in mutant lens fiber cells

To further probe the organization of F-actin networks in Tpm3.5-deficient lens fiber cells, we examined the localization of several F-actin-binding proteins, α-actinin 1 (hereafter α-actinin), fimbrin and Arp2/3, whose binding to F-actin are all modulated by Tpm3s (Blanchoin et al., 2001; Brayford et al., 2016; Bugyi et al., 2010; Christensen et al., 2017; Gateva et al., 2017; Hsiao et al., 2015; Skau and Kovar, 2010; Winkelman et al., 2016). In the *Tpm3/Δexon9d*<sup>+/+</sup> mature lens fiber cell, α-actinin puncta are enriched in the valleys between large paddles (Fig. 6A, arrows), while α-actinin puncta are increased and dispersed more broadly along the mutant *Tpm3/Δexon9d*<sup>-/-</sup> fiber cell membrane (Fig. 6A, open arrowheads), similar to the localization of β2-spectrin (Fig. 5). Since Tpm3s inhibit α-actinin binding to F-actin, increased α-actinin along fiber cell membranes in Tpm3.5-deficient lenses may be a consequence of newly available binding sites for α-actinin on F-actin at the fiber cell

membrane, similar to the mechanism proposed above for increased β2-spectrin.

We also investigated the localization of fimbrin in control and mutant lens fibers. In the control *Tpm3/Δexon9d*<sup>+/+</sup> lens fiber cell, fimbrin is localized to abundant small puncta near the base of small protrusions (Fig. 6B, arrows), consistent with our previous data (Cheng et al., 2016b). In contrast to α-actinin staining, which increases in mutant *Tpm3/Δexon9d*<sup>-/-</sup> lens fibers, fimbrin staining is noticeably reduced at the cell membrane, although it still retains a punctate distribution (Fig. 6B, filled arrowheads). Reduced fimbrin at the mutant cell membrane may be a consequence of the widely spaced filaments characteristic of α-actinin-crosslinked F-actin networks, which preclude fimbrin cross-linking of F-actin into compact bundles (Alberts et al., 2002; Vignjevic et al., 2006; Winkelman et al., 2016).

While F-actin crosslinking proteins are affected by decreased Tpm3.5 levels (Figs 5 and 6), we observe no obvious changes in Arp3 or N-cadherin localization between control and mutant mature lens fiber cells (Fig. S4B). Localization of Arp3 and N-cadherin in small puncta near the base of small protrusions is similar to what we have previously observed (Cheng et al., 2016b). These results suggest that adherens junctions and Arp2/3-nucleated branched F-actin networks are unlikely to be affected by decreased Tpm3.5 levels. The preservation of small protrusion interdigitations in mutant lens fiber cells is likely facilitated by the remaining fimbrin, Arp3 and N-cadherin at the base of small protrusions (Cheng et al., 2016b).



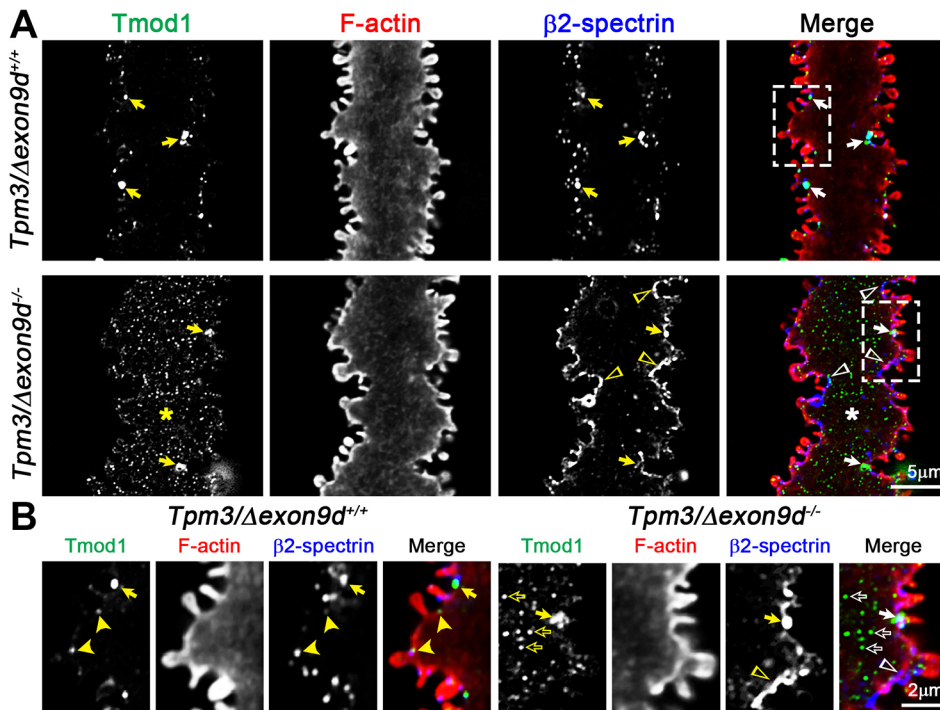

**Fig. 5.  $\beta$ 2-spectrin localization is altered in  $Tpm3/\Delta exon9d^{-/-}$  lens fiber cells.**

Immunostaining of single fiber cells from 6-week-old  $Tpm3/\Delta exon9d^{+/+}$  and  $Tpm3/\Delta exon9d^{-/-}$  lenses for Tmod1 (green), F-actin (red) and  $\beta$ 2-spectrin (blue). Images are single optical sections through the cell cytoplasm. (A) In the control mature fiber cell, there are large puncta of Tmod1 and  $\beta$ 2-spectrin staining in the valleys between large paddles (arrows). In the mutant mature fiber cells, while large puncta of Tmod1 and  $\beta$ 2-spectrin remain in the valleys between large paddles (arrows), most of the Tmod1 staining is now in the cell cytoplasm (asterisk) and  $\beta$ 2-spectrin staining is expanded along the cell membrane (open arrowheads). (B) An enlargement from the control mature fiber cell reveals Tmod1 puncta in the valley between large paddles (arrow) and along the cell membrane (arrowheads). In the mutant lens fiber, Tmod1 puncta are present in the cytoplasm (open arrows), and there is expanded  $\beta$ 2-spectrin staining (open arrowheads). Enriched Tmod1 and  $\beta$ 2-spectrin can still be found in the valley between large paddles in the mutant fiber cell (arrow). Scale bars: 5  $\mu$ m (A); 2  $\mu$ m (B).

#### Levels of Tmod1, actin and some actin-interacting cytoskeletal components are reduced in $Tpm3.5$ -deficient lenses

We examined whether the changes in immunostaining of cytoskeletal proteins described above might be explained by changes in total or cytosolic versus membrane-associated protein levels. We extracted proteins from pairs of 6-week-old  $Tpm3/\Delta exon9d^{+/+}$  and  $Tpm3/\Delta exon9d^{-/-}$  lenses and performed western blotting, normalizing labeling for each protein to total protein as visualized by Ponceau S (Fig. 7). Notably, there was a significant decrease in total Tmod1 levels ( $\sim 50\%$ ), suggesting that the reduced Tmod1 immunostaining signal on the fiber cell membrane (Figs 4–5) can be partly explained by a decrease in total Tmod1 protein levels. However, comparison of cytosolic and membrane-associated Tmod1 after biochemical fractionation of lenses showed that the proportion of Tmod1 associated with membranes was the same in  $Tpm3/\Delta exon9d^{+/+}$  and  $Tpm3/\Delta exon9d^{-/-}$  lenses (Fig. S5). This suggests that Tmod1 puncta in the cytoplasm may be associated with transcellular F-actin populations that co-sediment with the lens membrane fraction, as discussed above.

We also observed a decrease in levels of total actin, N-cadherin, ezrin and Arp3 (Fig. 7), which could suggest possible changes in cell–cell adhesion, although these decreases in total protein were not correlated with changes in the immunostaining signals nor in the subcellular distribution of F-actin, Arp3 and N-cadherin (Figs 4–6; Fig. S4B). Conversely, striking changes in distribution of  $\beta$ 2-spectrin and  $\alpha$ -actinin (Actn1) in lens fiber cells observed by immunostaining (Figs 5,6) are not correlated with changes in total protein levels. We also do not detect any change in the cytosolic versus membrane-associated fractions of actin,  $\beta$ 2-spectrin or  $\alpha$ -actinin in mutant lenses (Fig. S5). We also observed no changes in levels of ankyrin-B or fimbrin (Fig. 7). However, the immunostaining result (Fig. 6) suggests the fimbrin-associated F-actin network is partially disassembled. Tpm3s can also interact with actomyosin networks (Gunning et al., 2015; Khaitlina, 2015; Manstein and Mulvihill, 2016), but in mutant lenses, we did not

observe any differences in the total amounts of non-muscle myosin IIA (NMIIA, encoded by *Myh9*) and non-muscle myosin IIB (NMIIB, encoded by *Myh10*) proteins by western blotting (Fig. 7). We also performed immunostaining and determined that the localization of NMIIA and NMIIB was unchanged in mutant lens sections (Figs S6 and S7). Finally, we checked whether disruptions of the actin cytoskeleton affect specialized lens beaded intermediate filaments, which are also important for lens mechanical properties (Fudge et al., 2011; Gokhin et al., 2012). There was no change in levels of CP49 (also known as phakinin) or filensin, which form beaded intermediate filaments (Fig. 7). These data indicate that decreased Tpm3.5 leads to global changes in levels of actin and some, but not all F-actin-associated proteins, which may weaken the actin cytoskeleton and contribute to reduced mechanical stability of lens fiber cells. Together, our immunostaining and western blot results indicate that the F-actin network is rebalanced when Tpm3.5 levels are decreased, leading to a shift in the types of F-actin networks present in mutant lenses. While the proportion of F-actin associated with the fiber cell membrane remains the same, F-actin-crosslinking proteins appear to be redistributed to form alternative networks that do not contain Tpm3.5-coated F-actin.

#### DISCUSSION

We demonstrate that a Tpm protein is required for the normal biomechanical properties of the eye lens. This is the first evidence of the importance of a Tpm for cell stiffness in a non-muscle mechanical-load-bearing tissue. Specifically, Tpm3.5, a previously unstudied isoform, is needed for normal lens stiffness and resilience. The function of Tpm3s in non-muscle cell biomechanical properties has been alluded to in studies of cultured cells and red blood cells (RBCs) (Hundt et al., 2016; Jalilian et al., 2015; Sui et al., 2017; Tojkander et al., 2011; Wolfenson et al., 2016; Yang et al., 2016) but not previously shown *in vivo*. The lens is an ideal tissue to study the link between tissue biomechanics and cytoskeletal protein functions, because its function is tied to its mechanical properties. Other cytoskeletal components known to contribute to normal lens stiffness

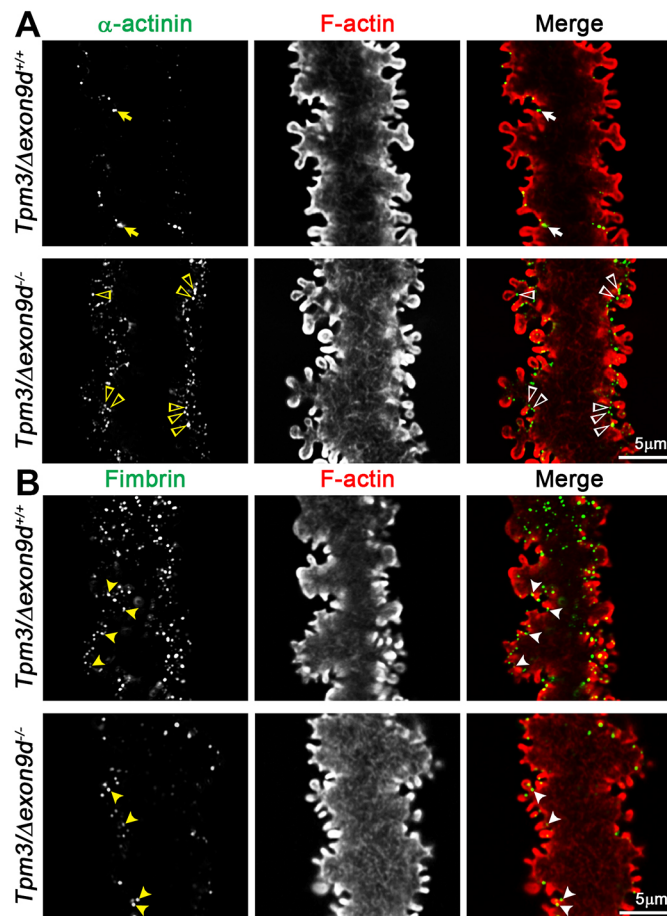

**Fig. 6. The  $\alpha$ -actinin–F-actin network is expanded while fimbrin-bundled F-actin is reduced in  $Tpm3/\Delta exon9d^{-/-}$  lens fibers.** (A) Immunostaining of single mature fiber cells from 6-week-old  $Tpm3/\Delta exon9d^{+/+}$  and  $Tpm3/\Delta exon9d^{-/-}$  lenses for  $\alpha$ -actinin (Actn1, green) and F-actin (red). Images are single optical sections through the cell cytoplasm. In the control lens fiber,  $\alpha$ -actinin is enriched in bright puncta in the valleys between large paddles (arrows). In the mutant lens fiber,  $\alpha$ -actinin staining is expanded to numerous small puncta along the cell membrane in the valleys between large paddles and at the base of small protrusions (open arrowheads). (B) Immunostaining of single mature fiber cells from 6-week-old  $Tpm3/\Delta exon9d^{+/+}$  and  $Tpm3/\Delta exon9d^{-/-}$  lenses for fimbrin (plastin, green) and F-actin (red). Fimbrin is localized in small puncta at the base of small protrusions in the control lens fiber (arrowheads). While the fimbrin localization pattern appears unaffected in the mutant lens fiber, the numbers of fimbrin puncta associated with the membrane protrusions appear reduced. Scale bars: 5  $\mu$ m.

are the specialized beaded intermediate filament proteins, filensin and CP49 (Fudge et al., 2011; Gokhin et al., 2012), and the membrane skeleton proteins, periaxin and ankyrin-B (Maddala et al., 2016), but loss of these proteins also results in lens growth defects and/or fiber cell degeneration that complicates the interpretation of mechanical property defects. In our case, Tpm3.5-deficient lenses have a very mild shape change without any gross morphological defects, allowing a more straightforward understanding of the relationship between cytoskeletal structures and overall tissue mechanics.

#### Decreased levels of Tpm3.5 lead to F-actin rearrangements, resulting in less mechanically stable networks and alterations to mechanical tissue properties

Our previous data and the work of others demonstrate that the actin cytoskeleton is vital to lens development, transparency, cell morphology, intercellular communication and biomechanics

(reviewed by Cheng et al., 2017). In  $Tpm3/\Delta exon9d^{-/-}$  lenses, altered biomechanical properties are likely due to rearrangement of F-actin networks in lens fiber cells (Fig. 8). Reduced Tpm3.5 is accompanied by dissociation of some Tmod1 from F-actin at the membrane, but an expansion of  $\beta 2$ -spectrin- and  $\alpha$ -actinin-associated F-actin networks along the cell membrane in mutant lens fiber cells. Partial dissociation of Tmod1 may be due to a decrease in F-actin-capping mediated by Tmod1, since Tpm3s enhance the Tmod1 affinity for F-actin-pointed-ends (Kostyukova and Hitchcock-DeGregori, 2004; Weber et al., 1994; Weber et al., 1999; Yamashiro et al., 2014). Expansion of both  $\alpha$ -actinin–F-actin and  $\beta 2$ -spectrin–F-actin networks could be a consequence of newly available F-actin-binding sites that are normally occluded by Tpm3.5 (Christensen et al., 2017; Fowler and Bennett, 1984b). In addition, the cooperative assembly of loose F-actin networks may be mediated by  $\alpha 2/\beta 2$ -spectrin crosslinkers and  $\alpha$ -actinin, which is homologous to  $\beta 2$ -spectrin and contains spectrin repeats in its protein structure (Djinovic-Carugo et al., 2002; Winkelman et al., 2016). These expanded  $\beta 2$ -spectrin and  $\alpha$ -actinin networks without Tpm3.5-stabilized or Tmod1-capped F-actin are likely to be less mechanically stable, leading to reduced  $Tpm3/\Delta exon9d^{-/-}$  lens stiffness and resilience at high mechanical loads. This notion is consistent with *in vitro* studies showing that Tpm3s protect pointed-end depolymerization of F-actin (Broschat, 1990; Broschat et al., 1989; Weber et al., 1994) and that Tpm-coated F-actin is more mechanically rigid (Fujime and Ishiwata, 1971; Grazi et al., 2004; Kojima et al., 1994).

It is interesting to note that the loss of Tmod1 causes a different lens phenotype than Tpm3.5 deficiency. Tmod1 is required for the formation of complex interdigitations between mature fiber cells, and loss of large fiber cell undulations, or paddles, in  $Tmod1^{-/-}$  lens fibers is correlated with a decrease in lens stiffness at low mechanical loads (Cheng et al., 2016b). In contrast, Tpm3.5-deficient lenses have normal fiber cell morphologies, but a decreased stiffness at high, but not low, mechanical loads. In  $Tmod1^{-/-}$  lenses, Tpm3.5 levels are reduced (Gokhin et al., 2012; Nowak et al., 2009), and the  $\alpha$ -actinin–F-actin network is expanded (Cheng et al., 2016b), similar to what is seen in the Tpm3.5-deficient lenses. However, the  $\beta 2$ -spectrin–F-actin networks at the membrane are disassembled in  $Tmod1^{-/-}$  fiber cells (Cheng et al., 2016b), whereas they are expanded in Tpm3.5-deficient fibers. Some Tmod1 remains associated with F-actin at the fiber cell membrane in Tpm3.5-deficient lenses (Fig. 4), notably in the valleys between the large paddles. This may be sufficient to stabilize the  $\beta 2$ -spectrin–F-actin networks at the membrane and to maintain normal lens paddle formation and biomechanical integrity at low mechanical loads. Thus, the normal mechanical properties of Tpm3.5-deficient lenses at low loads are consistent with no change being observed in cell morphology. We hypothesize that the rearranged F-actin networks in the Tpm3-deficient lenses are less mechanically stable only at high loads, leading to biomechanical defects. Thus, F-actin networks in  $Tmod1^{-/-}$  lenses (with reduced Tpm3.5 levels) and in Tpm3.5-deficient lenses (with reduced Tmod1 levels) appear to resemble one another in some, but not all respects, suggesting different functions for Tmod1 and Tpm3.5 in fiber cell F-actin networks, that then are reflected in their divergent functions in lens fiber cell morphology and biomechanics.

Our results are consistent with previous cell culture experiments where transfection with specific Tpm isoforms leads to assembly of different types of F-actin networks that alter cell migration and behavior, suggesting that Tpm isoforms control the type of F-actin networks that are formed (Bryce et al., 2003; Schevzov et al., 2005a;



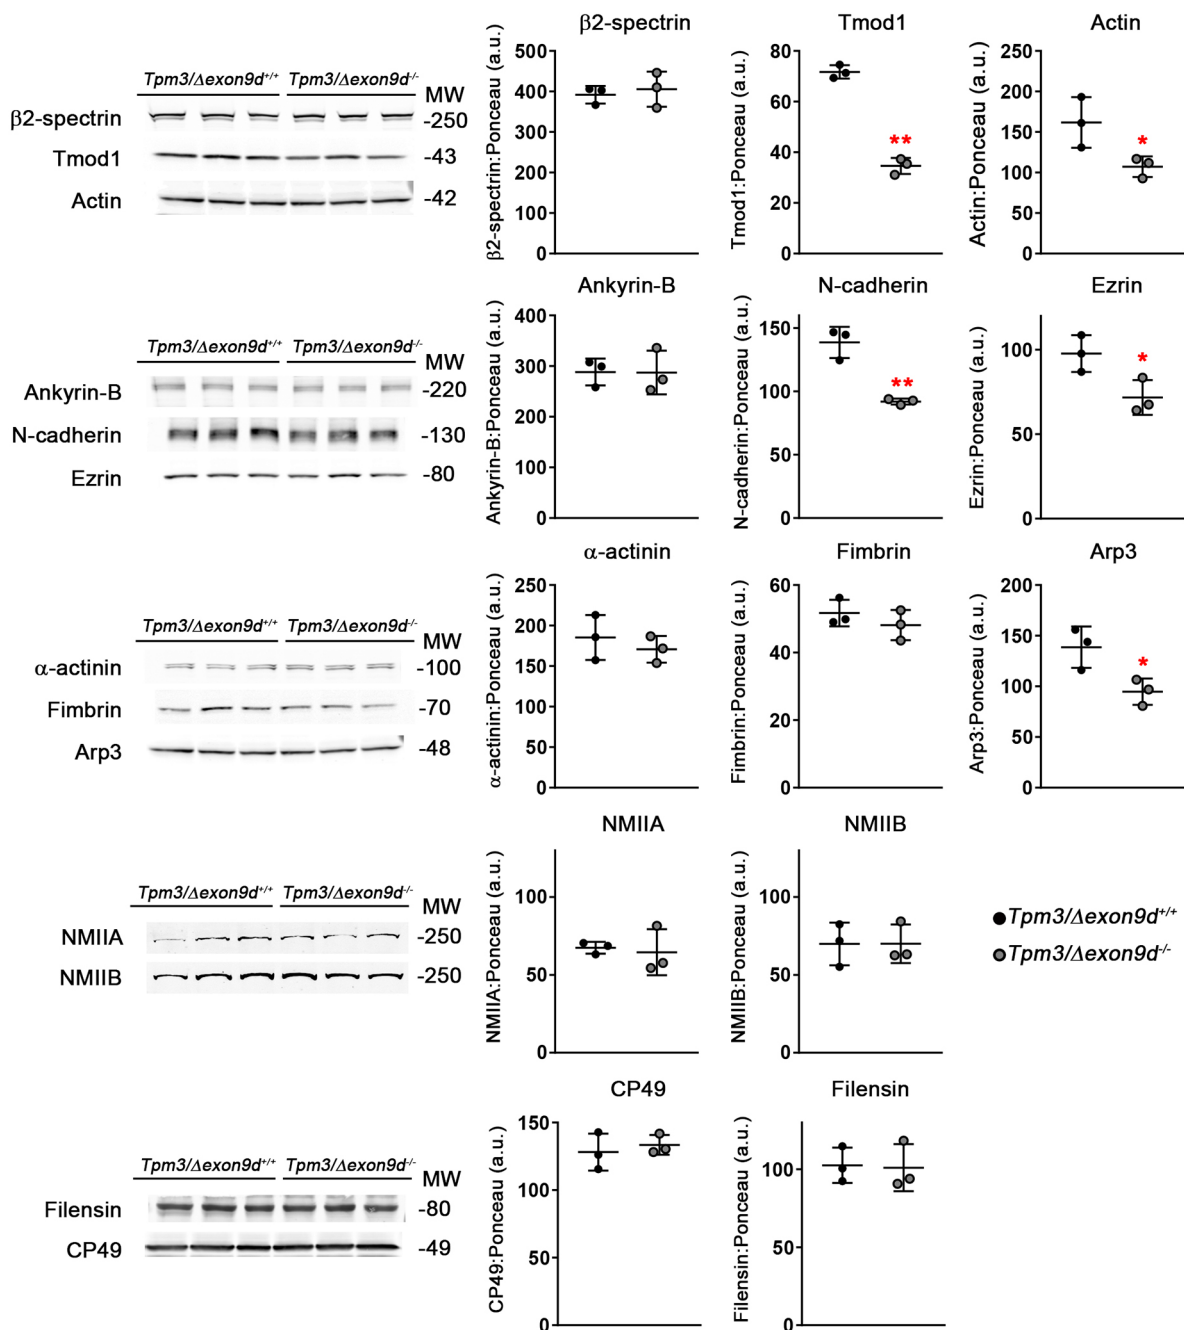

**Fig. 7. Reduced levels of Tpm3.5 affects levels of actin and select actin-associated proteins, Tmod1, N-cadherin, ezrin and Arp3.** Western blots of indicated proteins from 6-week-old *Tpm3/Δexon9d<sup>+/+</sup>* and *Tpm3/Δexon9d<sup>-/-</sup>* whole lenses. All protein levels were normalized to total protein level (Ponceau S staining). Membrane skeleton components, Tmod1 and actin, are decreased in *Tpm3/Δexon9d<sup>-/-</sup>* lenses, while β2-spectrin levels remained unchanged. Actin-associated proteins that link F-actin to the cell membrane, N-cadherin and ezrin, have decreased levels in mutant lenses, while the level of ankyrin-B is unaffected. Arp3, a nucleating protein for branched F-actin networks, is decreased in mutant lenses, but levels of F-actin cross-linking proteins, α-actinin (Actn1) and fimbrin, as well as NMIIA and NMIIB are unchanged. Decreased Tpm3.5 does not affect beaded intermediate filament proteins, CP49 and filensin, levels. Plots reflect the mean ± s.d. of *n*=3 independent protein samples per genotype. \**P*<0.05; \*\**P*<0.01.

Tojkander et al., 2011). Importantly, the proportions of β2-spectrin, α-actinin, Tmod1 and actin associated with fiber cell membranes in biochemical assays remain unchanged in *Tpm3/Δexon9d<sup>-/-</sup>* lenses, suggesting that the ratio of cytosolic G-actin to polymerized F-actin and overall network assembly are not affected. Thus, reorganization of F-actin networks due to reduced Tpm3.5, does not appear to depend upon net F-actin polymerization or depolymerization. Our data, from an intact tissue, thus supports the prevailing hypothesis that the total pool of G-actin is stable and that a variety of F-actin

networks are engaged in competition for a limited pool of G-actin that is available for polymerization (Suarez and Kovar, 2016). The inter-network competition between F-actin populations regulates network size and density, which can then determine cell and tissue biomechanical properties (Suarez and Kovar, 2016). While we have shown that decreased Tpm3.5 leads to steady-state F-actin network changes in fixed and immunostained lens fiber cells, it is unknown whether Tpm3.5 regulates active remodeling and reorganization of F-actin in lens fibers in resting lenses or in lenses under load. Other

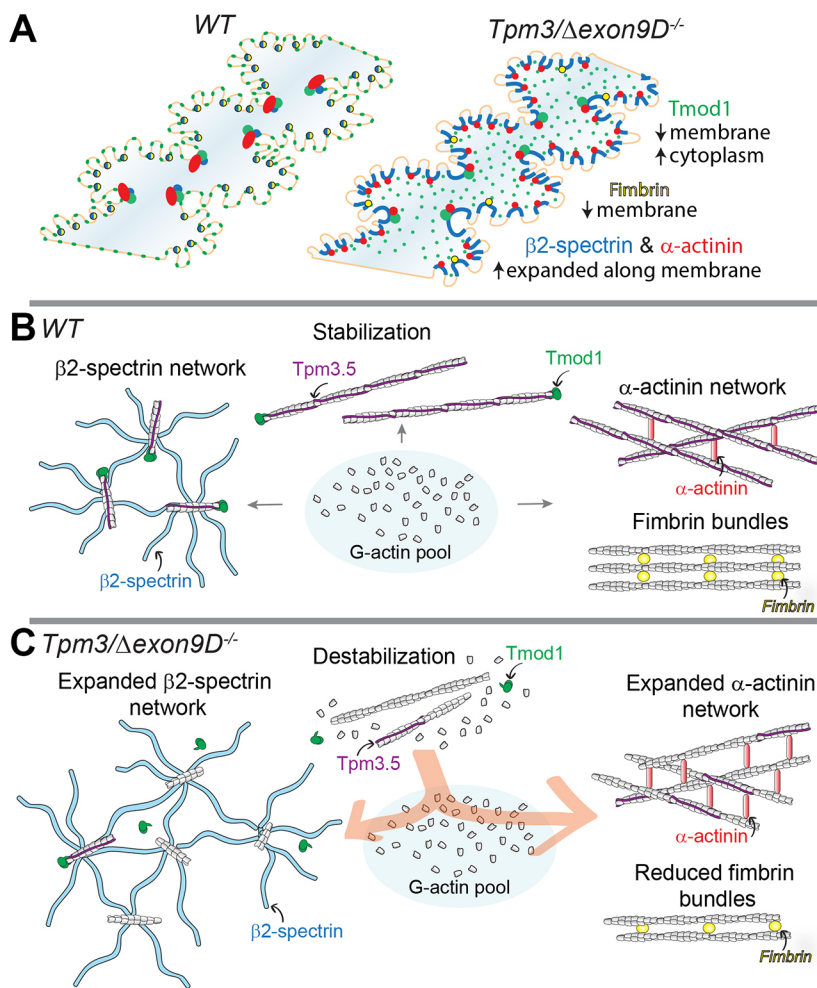

**Fig. 8. Tpm3.5 plays an important role in lens biomechanical properties by maintaining mechanically stable F-actin networks.** (A) In *Tpm3/Δexon9d<sup>-/-</sup>* mature lens fibers with reduced Tpm3.5, Tmod1 (green) is dissociated from the cell membrane and appears as cytoplasmic puncta. Loss of Tpm3.5 and Tmod1 from F-actin at the membrane likely leads to expansion of the β2-spectrin (blue) and α-actinin (red) F-actin networks. Competition between fimbrin and α-actinin may also lead to the loss of fimbrin from F-actin at the membrane. WT, wild-type. (B) In normal fiber cells, there is a balance between Tpm3.5- and Tmod1-mechanically-stabilized F-actin, the β2-spectrin-F-actin network and the α-actinin- or fimbrin-crosslinked F-actin networks. (C) In contrast, decreased levels of Tpm3.5 lead to depolymerization of Tmod1-capped F-actin. G-actin is then redistributed to other F-actin structures resulting in an expansion of the β2-spectrin and α-actinin networks. Not drawn to scale.

studies have shown that Tpm3s can regulate the actomyosin contractile network and, thus, influence cell mechanical properties and vesicular trafficking (Gunning et al., 2015; Khaitlina, 2015; Manstein and Mulvihill, 2016). While our data indicates that there is no change in the overall protein levels and localization of NMIIA and NMIIB in mutant lenses, future studies of myosin activity will be needed to determine whether Tpm3.5-mediated regulation of the actomyosin network may contribute to lens biomechanical functions.

#### Isoform compensation mechanisms in Tpm knockouts

Examination of Tpm isoforms expressed in the adult whole mouse lens by RT-PCR and sequencing of PCR products revealed expression of one long Tpm (Tpm1.7) and five short Tpm isoforms (Tpm1.8, Tpm1.9, Tpm1.13, Tpm3.5 and Tpm4.2) (Fig. 1; Fig. S1). Although Tpm3.1, which contains exon 9d, is not detected in the wild-type mouse lens, *Tpm3/Δexon9d<sup>-/-</sup>* lenses have an unexpected decrease in Tpm3.5, which contains exon 9a. This is unlike what is seen in brain and RBCs, which express Tpm3.1 and show the expected reduction in *Tpm3/Δexon9d<sup>-/-</sup>* mice (Fig. 1 and Fath et al., 2010; Sui et al., 2017). Tpm3.5 mRNA and protein levels are both reduced in *Tpm3/Δexon9d<sup>-/-</sup>* lenses, suggesting deletion of exon 9d results in aberrant splicing of exon 9a. No compensation by increased expression of other Tpm isoforms from the *Tpm3* gene, or from other Tpm genes, is detected in *Tpm3/Δexon9d<sup>-/-</sup>* lenses. However, it is certainly possible that normal levels of one or more of the other lens Tpm3s (1.7, 1.8, 1.9 or 4.2) may partially compensate for the reduced levels

of Tpm3.5 in *Tpm3/Δexon9d<sup>-/-</sup>* lenses, attenuating the severity of observed lens defects. Future studies will be required to evaluate the functions of these other Tpm3s in the lens and to determine whether compensation by or mislocalization of other lens Tpm isoforms could play a role in the reorganization of F-actin networks.

While an off-target isoform reduction has not been previously reported, several studies do show that isoform-specific knockout of Tpm3s can result in compensation by increased levels of a different Tpm isoform, likely accounting for the mild phenotypes and complex disease mechanisms. Brain-specific knockout of exon 9c in *Tpm3* leads to compensation by exon 9a-containing isoforms, resulting in no change in the total level of Tpm3 proteins (Vrhovski et al., 2004), and no gross brain abnormalities. In *Tpm3/Δexon9d<sup>-/-</sup>* neurons and fibroblasts, loss of Tpm3.1 and/or Tpm3.2 (exon 9d) is compensated by increased Tpm3 exon 9c isoforms, Tpm3.4 (TM5NM4) and Tpm3.7 (TM5NM7) (Fath et al., 2010), which we do not detect in control or mutant lenses (Fig. S1D). Only subtle changes in growth cone size and dendrite length were observed in cultured neurons isolated from *Tpm3/Δexon9d<sup>-/-</sup>* mice, suggesting that compensation by Tpm3.4 and Tpm 3.7 is sufficient to rescue the defects. In addition to compensation by alternative splicing products from the same gene, loss of one Tpm isoform can also result in functional compensation by another Tpm expressed from a different gene. RBCs only express Tpm1.9 and Tpm3.1 (Fowler, 2013; Fowler and Bennett, 1984a; Sung et al., 2000; Sung and Lin, 1994), and loss of Tpm3.1 in *Tpm3/Δexon9d<sup>-/-</sup>* RBCs causes a compensatory upregulation of Tpm1.9, resulting in hyperstable

F-actin and changes in the linkage between F-actin and the cell membrane (Sui et al., 2017). Therefore, tissue-specific compensatory upregulation or unexpected downregulation of alternative Tpm genes or splice products from the same gene can occur in exon-specific Tpm knockouts, and thus, knockout tissues may need to be screened more carefully for changes in other Tpm isoforms, looking for increased and decreased transcript and protein levels. More work needs to be done to unravel why germline deletion of exon 9d in *Tpm3* affects lens fiber cell transcript levels of a splice isoform that does not express the deleted exon.

### Decreased levels of Tpm3.5 results in a larger lens nucleus

This is the first report of a mutant mouse lens with an increased nucleus size, which is ~33% larger in volume in *Tpm3/Δexon9d<sup>-/-</sup>* lenses compared to controls. It has long been assumed that the hard lens nucleus affects overall lens tissue stiffness (Blankenship et al., 2007; Brown, 1973; Heys et al., 2004; Weeber et al., 2007). However, *Tpm3/Δexon9d<sup>-/-</sup>* lenses are softer but with a larger stiff lens nucleus, strongly suggesting the surprising conclusion that the lens nucleus does not play a significant role in the stiffness of the mouse lenses. This, in turn, implies that components determining the stiffness of mouse lenses under compressive load are restricted to the outermost fiber cell layers. This notion is supported by our recent study of multiscale load transfer in lens cells using a combination of coverslip compression of live mouse lenses and high-resolution confocal microscopy. Under axial compression, we observe changes in the lens capsule, epithelial and fiber cell shape and fiber–fiber interactions at the periphery of mouse lenses (Parreno et al., 2018). More studies are required to reveal subtle changes in cellular size and organization during bulk lens shape change during equatorial stretch and to inform future mathematical models for lens shape change and stiffness.

The rigid lens nucleus is hypothesized to be formed through a complex and poorly understood process of cell compaction that involves remodeling of lens fiber cell membranes from large paddles and protrusions to smoother-contoured membranes in inner fiber cells, with tongue-and-groove and square arrays of membrane protein particles visible in freeze-fracture images (Al-Ghoul et al., 2001; Freel et al., 2003; Kuwabara, 1975; Lo and Harding, 1984). The change in fiber cell membrane architecture is believed to allow compaction of inner fiber cells to form the hard nucleus (Costello et al., 2013; Taylor et al., 1996). However, we do not observe obvious changes in fiber cell membrane architecture by SEM between control and mutant lenses, suggesting that decreased Tpm3.5 levels do not accelerate the normal process of fiber cell membrane maturation and compaction. It is also hypothesized that inner fiber cell compaction is caused by gradual loss of water from the cell cytoplasm driven by rearrangement of abundant crystallin proteins into larger aggregates, thus decreasing osmolarity (Kenworthy et al., 1994; Tardieu et al., 1992). This mechanism would imply that reduced levels of Tpm3.5 may affect ion and water homeostasis in the lens, perhaps via cytoskeletal regulation of Aqp0 or gap junction channel organizations. Interestingly, interactions between Tpm1.9 and aquaporin 2 water channels are needed for cell volume regulation in MDCK cells (Li et al., 2009). Although we do not detect any changes in wet weight between control and Tpm3.5-deficient lenses, more work needs to be done to determine whether hydration levels of the nucleus are altered in Tpm3.5-deficient lenses. Further analyses of the *Tpm3/Δexon9d<sup>-/-</sup>* lens may provide a unique tool to elucidate how cytoskeletal proteins play a role in the innermost lens fiber cells during maturation and compaction to form the lens nucleus, as was originally proposed by Alcalá and Maisel (Alcalá and Maisel, 1985).

## MATERIALS AND METHODS

### Mice and lens pictures

All animal procedures were performed under an approved protocol from the Institutional Animal Care and Use Committee at The Scripps Research Institute in accordance with the Guide for the Care and Use of Laboratory Animals by the National Institutes of Health.

*Tpm3/Δexon9d<sup>-/-</sup>* mice were a generous gift from Peter Gunning (University of New South Wales, Sydney, Australia). Generation of *Tpm3/Δexon9d<sup>-/-</sup>* mice was previously described (Fath et al., 2010; Hook et al., 2011; Lees et al., 2013), resulting in an isoform-specific knockout of exon 9d from *Tpm3*, resulting in absence of Tpm3.1, Tpm3.2 and Tpm3.13. Several mouse strains carry an endogenous mutation in the *Bfsp2* (CP49-encoding) gene that results in the loss of a specialized beaded intermediate filament in the lens (Alizadeh et al., 2004; Gokhin et al., 2012; Sandilands et al., 2004; Simirskii et al., 2006). Therefore, *Tpm3/Δexon9d<sup>-/-</sup>* knockout mice were backcrossed for at least 12 generations to C57BL/6J wild-type mice that have wild-type *Bfsp2*. Heterozygous mice were bred to generate wild-type, heterozygous and homozygous knockout littermates, and genotyping for *Tpm3* and *Bfsp2* were performed by automated quantitative real-time PCR (qPCR) on tail snips (Transnetyx, Cordova, TN). Male and female wild-type and knockout littermates were used for experiments.

Lenses from 6-week-old mice were dissected immediately from freshly enucleated eyeballs in 1× PBS (14190, Thermo Fisher Scientific, Grand Island, New York). Lens pictures were acquired with an Olympus SZ11 dissecting microscope using a digital camera.

### Antibodies and reagents

Unless otherwise noted, antibodies were used for both western blotting and immunostaining. All antibodies used in this study have been previously used and described. Unless otherwise stated, antibodies were diluted 1:100 or 1:1000 for immunostaining or western blotting, respectively. Rabbit polyclonal primary antibodies included anti-ankyrin-B (C-terminal), a generous gift from Vann Bennett (Duke University, Durham, NC) (Scotland et al., 1998), anti-CP49 (rabbit 899) and anti-filensin (rabbit 76), generous gifts from Paul G. FitzGerald (University of California, Davis, CA), anti-pan-fimbrin, a generous gift from Paul Matsudaira (National University of Singapore) (Correia et al., 1999), anti-GAPDH (sc-25778, 1:200 dilution for western blotting, Santa Cruz Biotechnology, Santa Cruz, CA), anti-non-muscle-myosin-IIA (NMIIA, 909801, 1:200 for immunostaining, BioLegend, San Diego, CA), anti-non-muscle-myosin-IIIB (NMIIIB, M7939, 1:200 for immunostaining, Sigma-Aldrich, St. Louis, MO) and anti-human Tmod1 prepared in our laboratory (Gokhin et al., 2012). Mouse monoclonal primary antibodies used were anti- $\alpha$ -actinin (non-sarcomeric, Actn1, A5044, Sigma-Aldrich), anti-actin (C4, 1:20,000 dilution for western blotting, Millipore, Burlington, MA), anti-Arp3 (A5979, Sigma-Aldrich), anti-ezrin (E8897, Sigma-Aldrich), anti-N-cadherin (for western blotting, 18-0224, Zymed, San Francisco, CA), anti- $\beta$ 2-spectrin (612563, BD Biosciences, San Jose, CA) and anti-tropomyosin exon 9a [CH1, detects Tpm3.5, developed by Jim Jung-Ching Lin and obtained from the Developmental Studies Hybridoma Bank, Iowa City, IA (Gokhin et al., 2012; Nowak et al., 2009)]. Rat monoclonal anti-N-cadherin antibody (1:20 dilution for immunostaining) was a generous gift from Dietmar Vestweber (Max-Planck-Institute for Molecular Biomedicine, Münster, Germany) (Dorner et al., 2005). Sheep polyclonal anti-tropomyosin 5NM1 and 5NM2 (detecting Tpm3.1 and Tpm3.2) was from Chemicon (AB5447, Temecula, CA).

For immunostaining, secondary antibodies were Alexa-Fluor-488-conjugated goat anti-rabbit-IgG (A11008, Thermo Fisher Scientific), Alexa-Fluor-488-conjugated goat anti-mouse-IgG (115-545-166, minimal cross-reaction, Jackson ImmunoResearch, West Grove, PA), Alexa-Fluor-647-conjugated goat anti-rat-IgG (112-605-167, minimal cross-reaction, Jackson ImmunoResearch) and Alexa-Fluor-647-conjugated goat anti-mouse-IgG (A21236, Thermo Fisher Scientific). Rhodamine-phalloidin (R415, 1:50 dilution, Thermo Fisher Scientific) was used to stain F-actin and Hoechst 33258 (B2883, 1:1000 dilution, Sigma-Aldrich) stained nuclei.

For western blots, secondary antibodies (1:20,000 dilution) were IRDye-680LT-conjugated goat anti-mouse-IgG (926-68020, LI-COR, Lincoln, NE), IRDye-800CW-conjugated goat anti-rabbit-IgG (926-32211,



LI-COR) and IRDye-800CW-conjugated donkey anti-goat-IgG (926-32214, LI-COR).

### RNA isolation and RT-PCR

RNA was isolated from lenses and retina, brain, heart, skeletal muscle and kidney from 6-week-old mice, using Trizol (Thermo Fisher Scientific) according to manufacturer instructions. Two lenses or retinas from each mouse were pooled together into one RNA sample and homogenized in 100  $\mu$ l of Trizol X-100 for RNA isolation. Other tissues were cut into small chunks (~20–30 mg) and homogenized in 0.5 ml Trizol X-100 for RNA isolation. Reverse transcription was performed using the Superscript<sup>TM</sup> III First-Strand Synthesis System for RT-PCR kit (Thermo Fisher Scientific) from an equal amount of total RNA for each sample. PCR was performed with the same amount of cDNA from each sample in a 20  $\mu$ l volume reaction. PCR conditions for all primer sets were: denaturation at 95°C for 2 min, 40 cycles of denaturation at 95°C for 30 s, annealing at 54°C or 55°C (depending on the melting temperature of the primer set) for 30 s and elongation at 72°C for 1 min, and a final 2 min elongation at 72°C. cDNA quality was verified by PCR for  $\beta$ -actin (forward, 5'-TGCGTGACATCAAAGAGAAG-3'; reverse, GATGCCACAGGATTCCATA-3', product size ~200 bp). Tpm primers were designed using the NCBI website to span entire Tpm genes (Table S1). Equal volume of PCR product from each individual sample was loaded into 1% agarose gel for electrophoresis analysis. Bands were cut from the gel using clean razor blades, and PCR products were purified using the QIAquick gel extraction kit (Qiagen, Germantown, Maryland). Sanger sequencing was performed by Genewiz (La Jolla, CA). RNA from tissues other than the lens were used as positive controls for Tpm PCR reactions as needed. For semi-quantitative PCR, cycles of denaturation, annealing and elongation were lowered to 30 for Tpm3.5 and 20 for G3DPH. G3DPH was a housekeeping control gene using previously described primers (Xia et al., 2010). Band intensities were quantified using ImageJ, and Tpm3.5 band intensity was background subtracted and normalized to G3DPH band intensity. Mean, standard deviation and statistical significance (Student *t*-test, two-tailed) were calculated using Excel, and graphs were made with GraphPad Prism 7.

### Lens biomechanical testing and morphometrics

Stiffness and morphometrics of 8-week-old lenses were tested using sequential application of glass coverslips as previously described (Baradia et al., 2010; Cheng et al., 2016a; Gokhin et al., 2012). Briefly, freshly dissected lenses were transferred to a custom chamber filled with 1 $\times$  PBS. Lenses were compressed with glass coverslips, and images of the uncompressed and compressed lens were taken under an Olympus SZ11 dissecting microscope with digital camera. After loading and unloading coverslips, the lens capsule was gently dissected away from the lens by using fine forceps. Peripheral fiber cells were removed by rolling the lens between gloved fingertips. This removed the soft outer fiber cells and left a very hard, compact and round lens nucleus (center region of the lens). Images were taken of the lens nucleus for morphometric analysis. Image analysis was performed using ImageJ. To calculate strain, we used the formula  $\epsilon=(d-d_0)/d_0$ , where  $\epsilon$  is strain,  $d$  is the axial or equatorial diameter at a given load and  $d_0$  is the corresponding axial or equatorial diameter at zero load. Resilience was calculated as the ratio between the pre-compression axial diameter and the post-compression axial diameter. Lens volume was calculated as  $\text{volume}=\frac{4}{3}\pi\times r_E^2\times r_A$ , where  $r_E$  is the equatorial radius and  $r_A$  is the axial radius. Lens aspect ratio was a ratio of the axial and equatorial diameters. Nuclear volume was calculated as  $\text{volume}=\frac{4}{3}\pi\times r_N^3$ , where  $r_N$  is the radius of the lens nucleus. The nuclear fraction was calculated as a ratio between the nuclear volume and the lens volume. Strain curves and morphometrics were calculated in Excel and graphed in GraphPad Prism 7. Plots represent mean $\pm$ s.d. A Student's *t*-test (two-tailed) was used to determine statistical significance.

### Western blotting

Fresh lenses from 6-week-old mice were collected and stored at  $-80^\circ\text{C}$  until homogenization. Two lenses from each mouse were pooled into one protein sample. At least three pairs of lenses of each genotype were used to make separate protein samples. Lenses were homogenized on ice in a glass Dounce homogenizer in 250  $\mu$ l of lens homogenization buffer [20 mM Tris-HCl pH

7.4 at 4°C, 100 mM NaCl, 1 mM MgCl<sub>2</sub>, 2 mM EGTA and 10 mM NaF with 1 mM DTT, 1:100 Protease Inhibitor Cocktail (P8430, Sigma-Aldrich) and 1 tablet of PhosStop per 10 ml buffer (04906845001, Roche) added on the day of the experiment] per 10 mg of lens wet weight. Solubilized total lens proteins were transferred to a new Eppendorf tube. Half of the volume of total lens proteins were divided into a separate Eppendorf tube, and centrifuged at 21,130 *g* for 20 min at 4°C. The supernatant, containing the cytosolic protein fraction, was collected into a new Eppendorf tube. Total and cytosolic protein samples were diluted 1:1 with 2 $\times$  Laemmli sample buffer. The pellet, containing the membrane protein fraction, was washed twice with homogenization buffer and centrifuged at 21,130 *g* for 10 min between washes. The pellet was solubilized in lens homogenization buffer diluted 1:1 with 2 $\times$  Laemmli sample buffer. All samples were briefly sonicated and boiled for 5 min. Proteins were separated on 4–20% linear gradient SDS-PAGE mini-gels (Thermo Fisher Scientific) and transferred to nitrocellulose membranes. Gels were cut at the 150 kDa marker. The bottom half of the gel was transferred in buffer (12.5 mM Tris-HCl and 96 mM glycine in ddH<sub>2</sub>O, pH 8.5) with 20% methanol, and the top half of the gel was transferred in spectrin buffer (0.01% SDS without methanol) or myosin buffer (20% methanol with 0.1% SDS) for 1 h at 4°C. After transfer, nitrocellulose blots were incubated in 1 $\times$  PBS for 1 h at 65°C to increase binding of transferred proteins to the membrane. Membranes were then stained with Ponceau S (09189, Fluka BioChemica, Mexico City, Mexico), gently washed with ddH<sub>2</sub>O (until the protein bands are pink and the surrounding membrane is white) and scanned to reveal total protein levels in each lane. Blots were blocked for 2 h at room temperature with 4% BSA in 1 $\times$  PBS. Primary and secondary antibodies were diluted in Blitz buffer (4% BSA+0.1% Triton X-100 in 1 $\times$  PBS). Membranes were incubated in primary antibodies overnight at 4°C with gentle rocking and then washed with 1 $\times$  PBS+0.1% Triton X-100 (three times, 5 min/wash) before incubation in secondary antibodies for 2 h at room temperature in the dark with gentle rocking. After secondary antibody incubation, blots were washed again with 1 $\times$  PBS plus 0.1% Triton X-100 (four times, 5 min per wash). Bands on blots were visualized on a LI-COR Odyssey infrared imaging system, and band intensities were quantified using ImageJ with background subtraction and then normalization to the amount of total proteins between 40–250 kDa (Ponceau S staining). For calculation of the fraction of cytosolic and membrane protein, the cytosolic fraction band intensity was added to the membrane fraction intensity (to give the total intensity). The cytosolic fraction band intensity was then divided by the total intensity to determine the percentage of proteins in the cytosolic fraction. Mean, standard deviation and statistical significance (Student *t*-test, two-tailed) were calculated using Excel, and graphs were made with GraphPad Prism 7.

### Scanning electron microscopy

SEM of mouse lenses were performed as previously described (Cheng et al., 2016b). Briefly, a small hole was made in the posterior of enucleated eyeballs from 2-month-old mice. Eyeballs were fixed in fresh 2.5% glutaraldehyde in 0.1 M sodium cacodylate buffer, pH 7.3 at room temperature for 48–72 h. Lenses were dissected from eyes, and each lens was fractured using a sharp syringe needle (26G) in the anterior–posterior orientation. This orientation exposes interlocking protrusions and paddles along the short sides of fiber cells. Lens halves were postfixed in 1% aqueous OsO<sub>4</sub>, dehydrated in graded ethanol, dried in a critical point dryer (Tousimis Inc., Rockville, MD), mounted on specimen stubs and coated with gold/palladium in a Hummer 6.2 sputter coater (Anatech Inc., Union City, CA). Images were taken with a JEOL 820 scanning electron microscope (JEOL, Tokyo, Japan). To ensure images were from comparable depths in different lenses, the center of the lens nucleus was used as a reference, and images were aligned based on measurements from the center outwards to the lens equator. Four lenses from each genotype were examined, and representative images are shown.

### Immunostaining of frozen sections

Frozen sections from 6-week-old lenses were prepared as previously described (Cheng et al., 2016b). Briefly, a small opening was made at the corneal-scleral junction of freshly enucleated eyeballs to facilitate fixative penetration. Eyeballs were then fixed in freshly made 1%

paraformaldehyde (15710, Electron Microscopy Sciences, Hatfield, Pennsylvania) in PBS at 4°C for 4 h. Samples were then washed in PBS, cryoprotected in 30% sucrose and frozen in OCT medium (Sakura Finetek, Torrance, CA) in the cross-section orientation in blocks. Frozen sections (12 µm thick) were collected with a Leica CM1950 cryostat. Immunostaining of lens sections was conducted as previously described (Nowak et al., 2009; Nowak and Fowler, 2012). ProLong® Gold antifade reagent (Thermo Fisher Scientific) was used to mount the slides. Confocal images were collected using a Zeiss LSM780 microscope (100× objective, NA 1.4, 1× zoom). The lens equator in sections was identified based on the thickness of the lens epithelium (Nowak et al., 2009). Staining was repeated on three samples from different mice for each genotype, and representative data are shown.

### Immunostaining of single lens fiber cells

Single lens fiber cell staining was performed as previously described (Cheng et al., 2016b) with some modifications. Lenses were dissected from eyes from 6-week-old mice. Fine forceps were used to carefully dissect away the lens capsule leaving the bulk mass of fiber cells. Decapsulated lenses were fixed overnight in 1% paraformaldehyde in PBS at 4°C. Lenses were then cut into quarters, using a sharp scalpel, along the anterior–posterior axis. Fine forceps were used to gently remove the hard lens nucleus from each lens quarter (~40% of the tissue). Lens quarters were post-fixed in 1% paraformaldehyde in PBS for 15 min at room temperature and then washed two times briefly with PBS. Next, lens quarters were permeabilized and blocked using 3% normal goat serum, 3% BSA and 0.3% Triton X-100 in 1× PBS for 1 h at room temperature. Lens quarters were immersed in primary antibody diluted with blocking solution, overnight at 4°C. Samples were washed three times, 5 min per wash, with 1× PBS plus 0.1% Triton X-100 and incubated in secondary antibodies for 3 h at room temperature. Finally, lens quarters were washed again with 1× PBS plus 0.1% Triton X-100 (four times, 5 min per wash). To maximize dissociation of single lens fibers, fine forceps were used to tease apart the lens quarters into small tissue chunks, and these lens fiber bundles were then mounted in ProLong® Gold antifade reagent onto a glass slide with a 1.5 coverslip. Super-resolution confocal Z-stacks with 0.17 µm steps were collected of single fiber cells using a Zeiss LSM880 confocal microscope with an Airyscan module (100× objective, NA 1.46, 2× zoom). Z-stacks were processed using the Airyscan Auto 3D method (strength 6.0) in Zen 2.3 SP1 software. Airyscan Z-stacks were further analyzed using Velocity 6.3, and noise reduction using the fine filter was applied to all channels. Fiber cell morphology was used to approximate the maturity of fiber cells. Staining was repeated on at least three lenses from three different mice for each genotype, and representative data are shown. All images presented are single optical sections through the cytoplasm of the fiber cell.

### Manders' colocalization coefficient

Single optical sections from Tmod1 and Tpm3.5-stained single lens fibers were used for quantification. First, a 500×500 pixel region of interest (ROI) was selected for each image. Fiji was used to separate the color image into three grayscale single channel images. Then, the Coloc2 plugin was applied to find the Manders' coefficient for Tmod1–Tpm3.5. We used the value that represented the colocalization above the autothreshold for our calculations. This analysis was performed on three single fibers from three different animals for each genotype. The average, standard deviation and statistical significance (Student *t*-test, one-tailed) were calculated using Excel.

### Acknowledgements

We thank Dr Justin Parreno and members of the Fowler lab for discussions during this research.

### Competing interests

The authors declare no competing or financial interests.

### Author contributions

Conceptualization: C.C., V.M.F.; Methodology: C.C., R.B.N., M.B.A., S.K.B., W.-K.L., V.M.F.; Validation: C.C., R.B.N., V.M.F.; Formal analysis: C.C., M.B.A., S.K.B., W.-K.L., V.M.F.; Investigation: C.C., R.B.N., M.B.A., V.M.F.; Resources: C.C.,

V.M.F.; Data curation: C.C., R.B.N., V.M.F.; Writing - original draft: C.C., V.M.F.; Writing - review & editing: C.C., R.B.N., M.B.A., S.K.B., W.-K.L., V.M.F.; Visualization: C.C., R.B.N., V.M.F.; Supervision: C.C., W.-K.L., V.M.F.; Project administration: C.C., V.M.F.; Funding acquisition: C.C., W.-K.L., V.M.F.

### Funding

This work was supported by grants from the National Eye Institute [R21 EY027389 (to C.C.), R01 EY017724 (V.M.F. and subcontract to W.-K.L.) and R01 EY05314 (W.-K.L. and subcontract to V.M.F.)]. Deposited in PMC for release after 12 months.

### Supplementary information

Supplementary information available online at <http://jcs.biologists.org/lookup/doi/10.1242/jcs.222042.supplemental>

### References

- Al-Ghoul, K. J., Nordgren, R. K., Kuszak, A. J., Freel, C. D., Costello, M. J. and Kuszak, J. R. (2001). Structural evidence of human nuclear fiber compaction as a function of ageing and cataractogenesis. *Exp. Eye Res.* **72**, 199–214.
- Alberts, B., Johnson, A., Lewis, J., Raff, M., Roberts, K. and Walter, P. (2002) pp. 940–942. In *Molecular Biology of the Cell*. Garland Science, a member of the Taylor & Francis, New York.
- Aicallá, J. and Maisel, H. (1985). *Biochemistry of Lens Plasma Membrane and Cytoskeleton in The Ocular Lens: Structure, Function, and Pathology*. New York: Dekker.
- Alioto, S. L., Garabedian, M. V., Bellavance, D. R. and Goode, B. L. (2016). Tropomyosin and profilin cooperate to promote formin-mediated actin nucleation and drive yeast actin cable assembly. *Curr. Biol.* **26**, 3230–3237.
- Alizadeh, A., Clark, J., Seeberger, T., Hess, J., Blankenship, T. and FitzGerald, P. G. (2004). Characterization of a mutation in the lens-specific CP49 in the 129 strain of mouse. *Invest. Ophthalmol. Vis. Sci.* **45**, 884–891.
- Balasubramanian, M. K., Helfman, D. M. and Hemmingsen, S. M. (1992). A new tropomyosin essential for cytokinesis in the fission yeast *S. pombe*. *Nature* **360**, 84–87.
- Baradia, H., Nikahd, N. and Glasser, A. (2010). Mouse lens stiffness measurements. *Exp. Eye Res.* **91**, 300–307.
- Barua, B., Pamula, M. C. and Hitchcock-DeGregori, S. E. (2011). Evolutionarily conserved surface residues constitute actin binding sites of tropomyosin. *Proc. Natl. Acad. Sci. USA* **108**, 10150–10155.
- Blanchoin, L., Pollard, T. D. and Hitchcock-DeGregori, S. E. (2001). Inhibition of the Arp2/3 complex-nucleated actin polymerization and branch formation by tropomyosin. *Curr. Biol.* **11**, 1300–1304.
- Blankenship, T., Bradshaw, L., Shibata, B. and FitzGerald, P. (2007). Structural specializations emerging late in mouse lens fiber cell differentiation. *Invest. Ophthalmol. Vis. Sci.* **48**, 3269–3276.
- Brayford, S., Bryce, N. S., Schevzov, G., Haynes, E. M., Bear, J. E., Hardeman, E. C. and Gunning, P. W. (2016). Tropomyosin promotes lamellipodial persistence by collaborating with Arp2/3 at the leading edge. *Curr. Biol.* **26**, 1312–1318.
- Broschat, K. O. (1990). Tropomyosin prevents depolymerization of actin filaments from the pointed end. *J. Biol. Chem.* **265**, 21323–21329.
- Broschat, K. O., Weber, A. and Burgess, D. R. (1989). Tropomyosin stabilizes the pointed end of actin filaments by slowing depolymerization. *Biochemistry* **28**, 8501–8506.
- Brown, N. (1973). The change in shape and internal form of the lens of the eye on accommodation. *Exp. Eye Res.* **15**, 441–459.
- Bryce, N. S., Schevzov, G., Ferguson, V., Percival, J. M., Lin, J. J.-C., Matsumura, F., Bamburg, J. R., Jeffrey, P. L., Hardeman, E. C., Gunning, P. et al. (2003). Specification of actin filament function and molecular composition by tropomyosin isoforms. *Mol. Biol. Cell* **14**, 1002–1016.
- Bugyi, B., Didry, D. and Carlier, M. F. (2010). How tropomyosin regulates lamellipodial actin-based motility: a combined biochemical and reconstituted motility approach. *EMBO J.* **29**, 14–26.
- Cheng, C., Gokhin, D. S., Nowak, R. B. and Fowler, V. M. (2016a). Sequential application of glass coverslips to assess the compressive stiffness of the mouse lens: strain and morphometric analyses. *J. Vis. Exp.*
- Cheng, C., Nowak, R. B., Biswas, S. K., Lo, W.-K., FitzGerald, P. G. and Fowler, V. M. (2016b). Tropomodulin 1 regulation of actin is required for the formation of large paddle protrusions between mature lens fiber cells. *Invest. Ophthalmol. Vis. Sci.* **57**, 4084–4099.
- Cheng, C., Nowak, R. B. and Fowler, V. M. (2017). The lens actin filament cytoskeleton: diverse structures for complex functions. *Exp. Eye Res.* **156**, 58–71.
- Christensen, J. R., Hocky, G. M., Homa, K. E., Morgenthaler, A. N., Hitchcock-DeGregori, S. E., Voth, G. A. and Kovar, D. R. (2017). Competition between Tropomyosin, Fimbrin, and ADF/Cofilin drives their sorting to distinct actin filament networks. *Elife* **6**, e23152.

- Clarke, N. F., Kolski, H., Dye, D. E., Lim, E., Smith, R. L., Patel, R., Fahey, M. C., Bellance, R., Romero, N. B., Johnson, E. S. et al. (2008). Mutations in TPM3 are a common cause of congenital fiber type disproportion. *Ann. Neurol.* **63**, 329-337.
- Clayton, J. E., Pollard, L. W., Skolnick, M., Bookwalter, C. S., Hodges, A. R., Trybus, K. M. and Lord, M. (2014). Fission yeast tropomyosin specifies directed transport of myosin-V along actin cables. *Mol. Biol. Cell* **25**, 66-75.
- Correia, I., Chu, D., Chou, Y. H., Goldman, R. D. and Matsudaira, P. (1999). Integrating the actin and vimentin cytoskeletons. adhesion-dependent formation of fibrin-vimentin complexes in macrophages. *J. Cell Biol.* **146**, 831-842.
- Costello, M. J., Mohamed, A., Gilliland, K. O., Fowler, W. C. and Johnsen, S. (2013). Ultrastructural analysis of the human lens fiber cell remodeling zone and the initiation of cellular compaction. *Exp. Eye Res.* **116**, 411-418.
- Cranz-Mileva, S., Pamula, M. C., Barua, B., Desai, B., Hong, Y. H., Russell, J., Trent, R., Wang, J., Walworth, N. C. and Hitchcock-DeGregori, S. E. (2013). A molecular evolution approach to study the roles of tropomyosin in fission yeast. *PLoS ONE* **8**, e76726.
- Djinovic-Carugo, K., Gautel, M., Yläñne, J. and Young, P. (2002). The spectrin repeat: a structural platform for cytoskeletal protein assemblies. *FEBS Lett.* **513**, 119-123.
- Dorner, A. A., Wegmann, F., Butz, S., Wolburg-Buchholz, K., Wolburg, H., Mack, A., Nasdala, I., August, B., Westermann, J., Rathjen, F. G. et al. (2005). Coxsackievirus-adenovirus receptor (CAR) is essential for early embryonic cardiac development. *J. Cell Sci.* **118**, 3509-3521.
- Dufour, C., Weinberger, R. P., Schevzov, G., Jeffrey, P. L. and Gunning, P. (1998). Splicing of two internal and four carboxyl-terminal alternative exons in nonmuscle tropomyosin 5 pre-mRNA is independently regulated during development. *J. Biol. Chem.* **273**, 18547-18555.
- Dunn, K. W., Kamocka, M. M. and McDonald, J. H. (2011). A practical guide to evaluating colocalization in biological microscopy. *Am. J. Physiol. Cell Physiol.* **300**, C723-C742.
- Eppinga, R. D., Li, Y., Lin, J. L.-C. and Lin, J. J.-C. (2006). Tropomyosin and caldesmon regulate cytokinesis speed and membrane stability during cell division. *Arch. Biochem. Biophys.* **456**, 161-174.
- Fath, T., Agnes Chan, Y.-K., Vrhovski, B., Clarke, H., Curthoys, N., Hook, J., Lemckert, F., Schevzov, G., Tam, P., Watson, C. M. et al. (2010). New aspects of tropomyosin-regulated neurogenesis revealed by the deletion of Tm5NM1 and 2. *Eur. J. Cell Biol.* **89**, 489-498.
- Fowler, V. M. (2013). The human erythrocyte plasma membrane: a Rosetta Stone for decoding membrane-cytoskeleton structure. *Curr. Top Membr.* **72**, 39-88.
- Fowler, V. M. and Bennett, V. (1984a). Erythrocyte membrane tropomyosin. Purification and properties. *J. Biol. Chem.* **259**, 5978-5989.
- Fowler, V. M. and Bennett, V. (1984b). Tropomyosin: a new component of the erythrocyte membrane skeleton. *Prog. Clin. Biol. Res.* **159**, 57-71.
- Freel, C. D., al-Ghoul, K. J., Kuszak, J. R. and Costello, M. J. (2003). Analysis of nuclear fiber cell compaction in transparent and cataractous diabetic human lenses by scanning electron microscopy. *BMC Ophthalmol.* **3**, 1.
- Fudge, D. S., McCuaig, J. V., Van Stralen, S., Hess, J. F., Wang, H., Mathias, R. T. and FitzGerald, P. G. (2011). Intermediate filaments regulate tissue size and stiffness in the murine lens. *Invest. Ophthalmol. Vis. Sci.* **52**, 3860-3867.
- Fujime, S. and Ishiwata, S. (1971). Dynamic study of F-actin by quasielastic scattering of laser light. *J. Mol. Biol.* **62**, 251-265.
- Gateva, G., Kremneva, E., Reindl, T., Kotila, T., Kogan, K., Gressin, L., Gunning, P. W., Manstein, D. J., Michelot, A. and Lappalainen, P. (2017). Tropomyosin isoforms specify functionally distinct actin filament populations in vitro. *Curr. Biol.* **27**, 705-713.
- Geeves, M. A., Hitchcock-DeGregori, S. E. and Gunning, P. W. (2015). A systematic nomenclature for mammalian tropomyosin isoforms. *J. Muscle Res. Cell Motil.* **36**, 147-153.
- Glasser, A. (2008). Restoration of accommodation: surgical options for correction of presbyopia. *Clin. Exp. Optom.* **91**, 279-295.
- Glasser, A. and Campbell, M. C. W. (1998). Presbyopia and the optical changes in the human crystalline lens with age. *Vision Res.* **38**, 209-229.
- Glasser, A. and Campbell, M. C. (1999). Biometric, optical and physical changes in the isolated human crystalline lens with age in relation to presbyopia. *Vision Res.* **39**, 1991-2015.
- Gokhin, D. S., Nowak, R. B., Kim, N. E., Arnett, E. E., Chen, A. C., Sah, R. L., Clark, J. I. and Fowler, V. M. (2012). Tmod1 and CP49 synergize to control the fiber cell geometry, transparency, and mechanical stiffness of the mouse lens. *PLoS ONE* **7**, e48734.
- Grazi, E., Cintio, O. and Trombetta, G. (2004). On the mechanics of the actin filament: the linear relationship between stiffness and yield strength allows estimation of the yield strength of thin filament in vivo. *J. Muscle Res. Cell Motil.* **25**, 103-105.
- Gunning, P. W., Hardeman, E. C., Lappalainen, P. and Mulvihill, D. P. (2015). Tropomyosin - master regulator of actin filament function in the cytoskeleton. *J. Cell Sci.* **128**, 2965-2974.
- Heys, K. R., Cram, S. L. and Truscott, R. J. (2004). Massive increase in the stiffness of the human lens nucleus with age: the basis for presbyopia? *Mol. Vis.* **10**, 956-963.
- Hitchcock-DeGregori, S. E. and Barua, B. (2017). Tropomyosin structure, function, and interactions: a dynamic regulator. *Subcell Biochem.* **82**, 253-284.
- Hook, J., Lemckert, F., Schevzov, G., Fath, T. and Gunning, P. (2011). Functional identity of the gamma tropomyosin gene: implications for embryonic development, reproduction and cell viability. *Bioarchitecture* **1**, 49-59.
- Hsiao, J. Y., Goins, L. M., Petek, N. A. and Mullins, R. D. (2015). Arp2/3 complex and cofilin modulate binding of tropomyosin to branched actin networks. *Curr. Biol.* **25**, 1573-1582.
- Hughes, J. A. I., Cooke-Yarborough, C. M., Chadwick, N. C., Schevzov, G., Arbuckle, S. M., Gunning, P. and Weinberger, R. P. (2003). High-molecular-weight tropomyosins localize to the contractile rings of dividing CNS cells but are absent from malignant pediatric and adult CNS tumors. *Glia* **42**, 25-35.
- Hundt, N., Steffen, W., Pathan-Chhatbar, S., Taft, M. H. and Manstein, D. J. (2016). Load-dependent modulation of non-muscle myosin-2A function by tropomyosin 4.2. *Sci. Rep.* **6**, 20554.
- Jalilian, I., Heu, C., Cheng, H., Freittag, H., Desouza, M., Stehn, J. R., Bryce, N. S., Whan, R. M., Hardeman, E. C., Fath, T. et al. (2015). Cell elasticity is regulated by the tropomyosin isoform composition of the actin cytoskeleton. *PLoS ONE* **10**, e0126214.
- Janco, M., Bonello, T. T., Byun, A., Coster, A. C. F., Lebhar, H., Dedova, I., Gunning, P. W. and Böcking, T. (2016). The impact of tropomyosins on actin filament assembly is isoform specific. *Bioarchitecture* **6**, 61-75.
- Kee, A. J. and Hardeman, E. C. (2008). Tropomyosins in skeletal muscle diseases. *Adv. Exp. Med. Biol.* **644**, 143-157.
- Keeney, A. H., Hagman, R. E. and Fratello, C. J. (1995). *Dictionary of Ophthalmic Optics*. Boston: Butterworth-Heinemann.
- Kenworthy, A. K., Magid, A. D., Oliver, T. N. and McIntosh, T. J. (1994). Colloid osmotic pressure of steer alpha- and beta-crystallins: possible functional roles for lens crystallin distribution and structural diversity. *Exp. Eye Res.* **59**, 11-30.
- Khaitlina, S. Y. (2015). Tropomyosin as a regulator of actin dynamics. *Int. Rev. Cell Mol. Biol.* **318**, 255-291.
- Kojima, H., Ishijima, A. and Yanagida, T. (1994). Direct measurement of stiffness of single actin filaments with and without tropomyosin by in vitro nanomanipulation. *Proc. Natl. Acad. Sci. USA* **91**, 12962-12966.
- Kostyukova, A. S. (2008). Tropomodulin/tropomyosin interactions regulate actin pointed end dynamics. *Adv. Exp. Med. Biol.* **644**, 283-292.
- Kostyukova, A. S. and Hitchcock-DeGregori, S. E. (2004). Effect of the structure of the N terminus of tropomyosin on tropomodulin function. *J. Biol. Chem.* **279**, 5066-5071.
- Kuszak, J. R., Zoltoski, R. K. and Sivertson, C. (2004). Fibre cell organization in crystalline lenses. *Exp. Eye Res.* **78**, 673-687.
- Kuszak, J. R., Mazurkiewicz, M., Jison, L., Madurski, A., Ngando, A. and Zoltoski, R. K. (2006). Quantitative analysis of animal model lens anatomy: accommodative range is related to fiber structure and organization. *Vet. Ophthalmol.* **9**, 266-280.
- Kuwabara, T. (1975). The maturation of the lens cell: a morphologic study. *Exp. Eye Res.* **20**, 427-443.
- Lees, J. G., Ching, Y. W., Adams, D. H., Bach, C. T. T., Samuel, M. S., Kee, A. J., Hardeman, E. C., Gunning, P., Cowin, A. J. and O'Neill, G. M. (2013). Tropomyosin regulates cell migration during skin wound healing. *J. Invest. Dermatol.* **133**, 1330-1339.
- Lewis, R. A., Yamashiro, S., Gokhin, D. S. and Fowler, V. M. (2014). Functional effects of mutations in the tropomyosin-binding sites of tropomodulin1 and tropomodulin3. *Cytoskeleton (Hoboken)* **71**, 395-411.
- Li, Y.-H., Eto, K., Horikawa, S., Uchida, S., Sasaki, S., Li, X.-J. and Noda, Y. (2009). Aquaporin-2 regulates cell volume recovery via tropomyosin. *Int. J. Biochem. Cell Biol.* **41**, 2466-2476.
- Liu, H. P. and Bretscher, A. (1989). Disruption of the single tropomyosin gene in yeast results in the disappearance of actin cables from the cytoskeleton. *Cell* **57**, 233-242.
- Lo, W.-K. and Harding, C. V. (1984). Square arrays and their role in ridge formation in human lens fibers. *J. Ultrastruct. Res.* **86**, 228-245.
- Lo, W.-K., Biswas, S. K., Brako, L., Shiels, A., Gu, S. and Jiang, J. X. (2014). Aquaporin-0 targets interlocking domains to control the integrity and transparency of the eye lens. *Invest. Ophthalmol. Vis. Sci.* **55**, 1202-1212.
- Maddala, R., Walters, M., Brophy, P. J., Bennett, V. and Rao, P. V. (2016). Ankyrin-B directs membrane tethering of periaxin and is required for maintenance of lens fiber cell hexagonal shape and mechanics. *Am. J. Physiol. Cell Physiol.* **310**, C115-C126.
- Manders, E. M. M., Verbeek, F. J. and Aten, J. A. (1993). Measurement of colocalization of objects in dual-color confocal images. *J. Microsc. Oxford* **169**, 375-382.
- Manstein, D. J. and Mulvihill, D. P. (2016). Tropomyosin-mediated regulation of cytoplasmic myosins. *Traffic* **17**, 872-877.
- Marttila, M., Lehtokari, V.-L., Marston, S., Nyman, T. A., Barnerias, C., Beggs, A. H., Bertini, E., Ceyhan-Birsoy, O., Cintas, P., Gerard, M. et al. (2014). Mutation update and genotype-phenotype correlations of novel and previously described mutations in TPM2 and TPM3 causing congenital myopathies. *Hum. Mutat.* **35**, 779-790.
- Michele, D. E., Albayya, F. P. and Metzger, J. M. (1999). A nemaline myopathy mutation in alpha-tropomyosin causes defective regulation of striated muscle force production. *J. Clin. Invest.* **104**, 1575-1581.



- Millodot, M.** (2009). *Dictionary of Optometry and Visual Science*. Edinburgh; New York: Elsevier/Butterworth-Heinemann.
- Mudry, R. E., Perry, C. N., Richards, M., Fowler, V. M. and Gregorio, C. C.** (2003). The interaction of tropomodulin with tropomyosin stabilizes thin filaments in cardiac myocytes. *J. Cell Biol.* **162**, 1057-1068.
- Nakano, K. and Mabuchi, I.** (2006). Actin-capping protein is involved in controlling organization of actin cytoskeleton together with ADF/cofilin, profilin and F-actin crosslinking proteins in fission yeast. *Genes Cells* **11**, 893-905.
- Nowak, R. B. and Fowler, V. M.** (2012). Tropomodulin 1 constrains fiber cell geometry during elongation and maturation in the lens cortex. *J. Histochem. Cytochem.* **60**, 414-427.
- Nowak, R. B., Fischer, R. S., Zoltoski, R. K., Kuszak, J. R. and Fowler, V. M.** (2009). Tropomodulin1 is required for membrane skeleton organization and hexagonal geometry of fiber cells in the mouse lens. *J. Cell Biol.* **186**, 915-928.
- Ochala, J.** (2008). Thin filament proteins mutations associated with skeletal myopathies: defective regulation of muscle contraction. *J. Mol. Med. (Berl.)* **86**, 1197-1204.
- Ono, S. and Ono, K.** (2002). Tropomyosin inhibits ADF/cofilin-dependent actin filament dynamics. *J. Cell Biol.* **156**, 1065-1076.
- Ottenheijm, C. A. C., Lawlor, M. W., Stienen, G. J. M., Granzier, H. and Beggs, A. H.** (2011). Changes in cross-bridge cycling underlie muscle weakness in patients with tropomyosin 3-based myopathy. *Hum. Mol. Genet.* **20**, 2015-2025.
- Parreno, J., Cheng, C., Nowak, R. B. and Fowler, V. M.** (2018). The effects of mechanical strain on mouse eye lens capsule and cellular microstructure. *Mol. Biol. Cell* **29**, 1963-1974.
- Percival, J. M., Thomas, G., Cock, T.-A., Gardiner, E. M., Jeffrey, P. L., Lin, J. J.-C., Weinberger, R. P. and Gunning, P.** (2000). Sorting of tropomyosin isoforms in synchronised NIH 3T3 fibroblasts: evidence for distinct microfilament populations. *Cell Motil. Cytoskeleton.* **47**, 189-208.
- Pittenger, M. F., Kazzaz, J. A. and Helfman, D. M.** (1994). Functional properties of non-muscle tropomyosin isoforms. *Curr. Opin. Cell Biol.* **6**, 96-104.
- Rao, J. N., Madasu, Y. and Dominguez, R.** (2014). Mechanism of actin filament pointed-end capping by tropomodulin. *Science* **345**, 463-467.
- Sandilands, A., Wang, X., Hutcheson, A. M., James, J., Prescott, A. R., Wegener, A., Pekny, M., Gong, X. and Quinlan, R. A.** (2004). Bfsp2 mutation found in mouse 129 strains causes the loss of CP49' and induces vimentin-dependent changes in the lens fibre cell cytoskeleton. *Exp. Eye Res.* **78**, 875-889.
- Scarcelli, G., Kim, P. and Yun, S. H.** (2011). In vivo measurement of age-related stiffening in the crystalline lens by Brillouin optical microscopy. *Biophys. J.* **101**, 1539-1545.
- Schevzov, G., Bryce, N. S., Almonte-Baldonado, R., Joya, J., Lin, J. J.-C., Hardeman, E., Weinberger, R. and Gunning, P.** (2005a). Specific features of neuronal size and shape are regulated by tropomyosin isoforms. *Mol. Biol. Cell* **16**, 3425-3437.
- Schevzov, G., Vrhovski, B., Bryce, N. S., Elmir, S., Qiu, M. R., O'Neill, G. M., Yang, N., Verrills, N. M., Kavallaris, M. and Gunning, P. W.** (2005b). Tissue-specific tropomyosin isoform composition. *J. Histochem. Cytochem.* **53**, 557-570.
- Schevzov, G., Whittaker, S. P., Fath, T., Lin, J. J.-C. and Gunning, P. W.** (2011). Tropomyosin isoforms and reagents. *Bioarchitecture* **1**, 135-164.
- Scotland, P., Zhou, D., Benveniste, H. and Bennett, V.** (1998). Nervous system defects of AnkyrinB (-/-) mice suggest functional overlap between the cell adhesion molecule L1 and 440-kD AnkyrinB in premyelinated axons. *J. Cell Biol.* **143**, 1305-1315.
- Simirskii, V. N., Lee, R. S., Wawrousek, E. F. and Duncan, M. K.** (2006). Inbred FVB/N mice are mutant at the cp49/Bfsp2 locus and lack beaded filament proteins in the lens. *Invest. Ophthalmol. Vis. Sci.* **47**, 4931-4934.
- Skau, C. T. and Kovar, D. R.** (2010). Fimbrin and tropomyosin competition regulates endocytosis and cytokinesis kinetics in fission yeast. *Curr. Biol.* **20**, 1415-1422.
- Skau, C. T., Neidt, E. M. and Kovar, D. R.** (2009). Role of tropomyosin in formin-mediated contractile ring assembly in fission yeast. *Mol. Biol. Cell* **20**, 2160-2173.
- Stark, B. C., Sladewski, T. E., Pollard, L. W. and Lord, M.** (2010). Tropomyosin and myosin-II cellular levels promote actomyosin ring assembly in fission yeast. *Mol. Biol. Cell* **21**, 989-1000.
- Suarez, C. and Kovar, D. R.** (2016). Inter-network competition for monomers governs actin cytoskeleton organization. *Nat. Rev. Mol. Cell Biol.* **17**, 799-810.
- Sui, Z., Gokhin, D. S., Nowak, R. B., Guo, X., An, X. and Fowler, V. M.** (2017). Stabilization of F-actin by tropomyosin isoforms regulates the morphology and mechanical behavior of red blood cells. *Mol. Biol. Cell* **28**, 2531-2542.
- Sung, L. A. and Lin, J. J. C.** (1994). Erythrocyte tropomodulin binds to the N-terminus of hTM5, a tropomyosin isoform encoded by the gamma-tropomyosin gene. *Biochem. Biophys. Res. Commun.* **201**, 627-634.
- Sung, L. A., Gao, K. M., Yee, L. J., Temm-Grove, C. J., Helfman, D. M., Lin, J. J. and Mehrpouryan, M.** (2000). Tropomyosin isoform 5b is expressed in human erythrocytes: implications of tropomodulin-TM5 or tropomodulin-TM5b complexes in the protofilament and hexagonal organization of membrane skeletons. *Blood* **95**, 1473-1480.
- Tajsharghi, H., Ohlsson, M., Palm, L. and Oldfors, A.** (2012). Myopathies associated with beta-tropomyosin mutations. *Neuromuscul. Disord.* **22**, 923-933.
- Tardieu, A., Veretout, F., Krop, B. and Slingsby, C.** (1992). Protein interactions in the calf eye lens: interactions between beta-crystallins are repulsive whereas in gamma-crystallins they are attractive. *Eur. Biophys. J.* **21**, 1-12.
- Taylor, V. L., al-Ghoul, K. J., Lane, C. W., Davis, V. A., Kuszak, J. R. and Costello, M. J.** (1996). Morphology of the normal human lens. *Invest. Ophthalmol. Vis. Sci.* **37**, 1396-1410.
- Temm-Grove, C. J., Jockusch, B. M., Weinberger, R. P., Schevzov, G. and Helfman, D. M.** (1998). Distinct localizations of tropomyosin isoforms in LLC-PK1 epithelial cells suggests specialized function at cell-cell adhesions. *Cell Motil. Cytoskeleton.* **40**, 393-407.
- Tojkander, S., Gateva, G., Schevzov, G., Hotulainen, P., Naumanen, P., Martin, C., Gunning, P. W. and Lappalainen, P.** (2011). A molecular pathway for myosin II recruitment to stress fibers. *Curr. Biol.* **21**, 539-550.
- Vignjevic, D., Kojima, S., Aratyn, Y., Danciu, O., Svitkina, T. and Borisy, G. G.** (2006). Role of fascin in filopodial protrusion. *J. Cell Biol.* **174**, 863-875.
- Vindin, H. and Gunning, P.** (2013). Cytoskeletal tropomyosins: choreographers of actin filament functional diversity. *J. Muscle Res. Cell Motil.* **34**, 261-274.
- Vrhovski, B., Lemckert, F. and Gunning, P.** (2004). Modification of the tropomyosin isoform composition of actin filaments in the brain by deletion of an alternatively spliced exon. *Neuropharmacology* **47**, 684-693.
- Wattanasirichaigoon, D., Swoboda, K. J., Takada, F., Tong, H.-Q., Lip, V., Iannaccone, S. T., Wallgren-Pettersson, C., Laing, N. G. and Beggs, A. H.** (2002). Mutations of the slow muscle alpha-tropomyosin gene, TPM3, are a rare cause of nemaline myopathy. *Neurology* **59**, 613-617.
- Weber, A., Pennise, C. R., Babcock, G. G. and Fowler, V. M.** (1994). Tropomodulin caps the pointed ends of actin filaments. *J. Cell Biol.* **127**, 1627-1635.
- Weber, A., Pennise, C. R. and Fowler, V. M.** (1999). Tropomodulin increases the critical concentration of barbed end-capped actin filaments by converting ADP.P(i)-actin to ADP-actin at all pointed filament ends. *J. Biol. Chem.* **274**, 34637-34645.
- Weber, K. L., Fischer, R. S. and Fowler, V. M.** (2007). Tmod3 regulates polarized epithelial cell morphology. *J. Cell Sci.* **120**, 3625-3632.
- Weeber, H. A., Eckert, G., Pechhold, W. and van der Heijden, R. G. L.** (2007). Stiffness gradient in the crystalline lens. *Graefes. Arch. Clin. Exp. Ophthalmol.* **245**, 1357-1366.
- Willekens, B. and Vrensen, G.** (1981). The three-dimensional organization of lens fibers in the rabbit. A scanning electron microscopic reinvestigation. *Albrecht. Von Graefes. Arch. Klin. Exp. Ophthalmol.* **216**, 275-289.
- Willekens, B. and Vrensen, G.** (1982). The three-dimensional organization of lens fibers in the rhesus monkey. *Graefes. Arch. Clin. Exp. Ophthalmol.* **219**, 112-120.
- Winkelman, J. D., Suarez, C., Hocky, G. M., Harker, A. J., Morganthaler, A. N., Christensen, J. R., Voth, G. A., Bartles, J. R. and Kovar, D. R.** (2016). Fascin and alpha-actinin-bundled networks contain intrinsic structural features that drive protein sorting. *Curr. Biol.* **26**, 2697-2706.
- Wolfenson, H., Meacci, G., Liu, S., Stachowiak, M. R., Iskratsch, T., Ghassemi, S., Roca-Cusachs, P., O'Shaughnessy, B., Hone, J. and Sheetz, M. P.** (2016). Tropomyosin controls sarcomere-like contractions for rigidity sensing and suppressing growth on soft matrices. *Nat. Cell Biol.* **18**, 33-42.
- Xia, C. H., Yablonka-Reuveni, Z. and Gong, X.** (2010). LRP5 is required for vascular development in deeper layers of the retina. *PLoS ONE* **5**, e11676.
- Yamashiro, S., Gokhin, D. S., Kimura, S., Nowak, R. B. and Fowler, V. M.** (2012). Tropomodulins: pointed-end capping proteins that regulate actin filament architecture in diverse cell types. *Cytoskeleton (Hoboken)* **69**, 337-370.
- Yamashiro, S., Gokhin, D. S., Sui, Z., Bergeron, S. E., Rubenstein, P. A. and Fowler, V. M.** (2014). Differential actin-regulatory activities of Tropomodulin1 and Tropomodulin3 with diverse tropomyosin and actin isoforms. *J. Biol. Chem.* **289**, 11616-11629.
- Yang, B., Lieu, Z. Z., Wolfenson, H., Hameed, F. M., Bershadsky, A. D. and Sheetz, M. P.** (2016). Mechanosensing controlled directly by tyrosine kinases. *Nano Lett.* **16**, 5951-5961.
